1 **Detecting past and ongoing natural selection among ethnically Tibetan women at high altitude in**  
2 **Nepal**

3  
4 **Authors:** Choongwon Jeong<sup>1†</sup>, David B. Witonsky<sup>1</sup>, Buddha Basnyat<sup>2</sup>, Maniraj Neupane<sup>3</sup>, Cynthia M.  
5 Beall<sup>4</sup>, Geoff Childs<sup>5</sup>, Sienna R. Craig<sup>6</sup>, John Novembre<sup>1</sup>, Anna Di Rienzo<sup>1,\*</sup>

6  
7 **Affiliations**

8 <sup>1</sup> Department of Human Genetics, University of Chicago, Chicago, IL, USA

9 <sup>2</sup> Oxford University Clinical Research Unit, Patan Hospital, Kathmandu, Nepal

10 <sup>3</sup> Mountain Medicine Society of Nepal, Kathmandu, Nepal

11 <sup>4</sup> Department of Anthropology, Case Western Reserve University, Cleveland, OH, USA

12 <sup>5</sup> Department of Anthropology, Washington University in St. Louis, St. Louis, MO, USA

13 <sup>6</sup> Department of Anthropology, Dartmouth College, Hanover, NH, USA

14 <sup>†</sup> Current Address: Department of Archaeogenetics, Max Planck Institute for the Science of Human  
15 History, Jena, Germany

16  
17 **\*Corresponding authors:** E-mail: [dirienzo@bsd.uchicago.edu](mailto:dirienzo@bsd.uchicago.edu)

18

## 19 **Abstract**

20 Adaptive evolution in humans has rarely been characterized for its whole set of components, i.e.  
21 selective pressure, adaptive phenotype, beneficial alleles and realized fitness differential. We combined  
22 approaches for detecting selective sweeps and polygenic adaptations and for mapping the genetic bases of  
23 physiological and fertility phenotypes in approximately 1000 indigenous ethnically Tibetan women from  
24 Nepal, adapted to high altitude. We performed genome-wide association analysis and tests for polygenic  
25 adaptations which showed evidence of positive selection for alleles associated with more pregnancies and  
26 live births and evidence of negative selection for those associated with higher offspring mortality. Lower  
27 hemoglobin level did not show clear evidence for polygenic adaptation, despite its strong association with  
28 an *EPAS1* haplotype carrying selective sweep signals.

29

30

## 31 **Introduction**

32 Understanding the impact of natural selection on phenotypic variation has been a central focus of  
33 evolutionary biology since its beginning as a modern scientific discipline. Decades of research have  
34 accumulated evidence for widespread adaptive phenotypic evolution in nature, including correlations  
35 between phenotypes and environmental factors [1-3], and higher reproductive success of native  
36 individuals compared to visitors [4]. Beyond the phenotypic studies, much effort has been devoted,  
37 especially in humans, to identifying adaptive alleles through indirect statistical approaches that use genetic  
38 variation data and that can detect the impact of past selective pressures [5]. The most widely used family  
39 of approaches aims at detecting new beneficial mutations that were quickly driven to high frequency or  
40 fixation by natural selection, a model that is often referred to as selective sweep [5]. These approaches  
41 have been applied to genome-wide variation data sets and have identified a large number of candidate  
42 adaptive alleles with strong effects on traits such as light skin pigmentation, lactase persistence, and  
43 resistance to pathogens [6-9]. However, genome-wide association studies have revealed that most  
44 phenotypic variation in humans is highly polygenic; in other words, it is due to the combined effects of a  
45 large number of alleles with small effects [10-12]. Under this scenario, adaptations will tend to generate  
46 upward shifts in the frequency of adaptive alleles at many loci rather than a major shift at one or few loci,  
47 as is the case, for example, for lactase persistence. Methods for detecting polygenic adaptations combine  
48 two sources of information: genome-wide association studies (GWAS) provide alleles associated with a  
49 phenotype of interest as well as their effect size, and the population frequency of GWAS alleles enable  
50 inter-population comparison [13-15]. An early example of this class of approaches showed that GWAS  
51 alleles for greater height tend to be more common in northern compared to southern European populations  
52 [13]. Indeed, height is the canonical example of polygenic adaptations in humans [14-16].

53           These indirect methods can provide evidence for past selective events, but each is sensitive to  
54 different selection models [17, 18], thus providing insights into a subset of adaptive alleles [19]. Moreover,  
55 these approaches cannot distinguish among selective effects on different fitness components, e.g. fertility  
56 vs. viability. A major advantage of indirect approaches is that they can detect selective sweep signals due  
57 to plausible, low selection coefficients (as long as  $4N_e s > 1$ ) with comparatively small sample sizes.

58           A complementary set of approaches aims at assessing directly the effects of genotype on  
59 reproductive fitness [20]. These direct approaches have many advantages, mainly the ability to detect  
60 selective events occurring in the present generation and the similar sensitivity to different selection models,  
61 e.g. balancing vs. directional selection [21]. However, they require large sample sizes to detect plausible  
62 selective coefficients. Large cohorts with genetic information are becoming increasingly available for  
63 humans, enabling approaches that were not feasible until recently [16, 22]. For example, a recent study  
64 analyzed two cohorts, for a total of more than 175,000 individuals, to assess genetic effects on viability by  
65 identifying alleles that changed in frequency across adulthood [23]. Another direct approach is to search  
66 for variants influencing fitness through GWAS of reproductive traits such as number of children ever born  
67 [24], twinning rate or mother's age at first birth [25]. However, the genetic bases of reproductive traits  
68 remain markedly understudied, despite their great evolutionary and biomedical significance [26].

69           High altitude populations have emerged as an ideal system to study the genetic architecture of  
70 human adaptations. Populations of the high-altitude regions of Tibetan, Andean, and East African Plateaus  
71 have been exposed to the stress of hypobaric hypoxia for sufficient time [27] to have allowed the  
72 evolution of new adaptive traits [28]. In fact, these indigenous populations are known to have phenotypes  
73 distinct from those of lowlanders at high altitude and from each other. Examples include unelevated  
74 hemoglobin concentration (Hb) in Tibetans and Ethiopian Amhara [29, 30], the barrel-shaped chest in  
75 Aymara and Quechua [31] and many others (reviewed in [28, 32]). In the context of studies of high-  
76 altitude adaptation, the term "Tibetan" refers to the modern descendants of the ancient indigenous  
77 population of the Tibetan plateau who share cultural and biological affinities and reside in several polities,  
78 including Nepal. Recent population genomic studies of Tibetans detected strong selective sweep signals in  
79 Tibetans at two loci, *EGLN1* (egl-9 family hypoxia inducible factor 1) and *EPAS1* (endothelial PAS  
80 domain containing protein 1) [33-35], each coding for a key component of the regulatory program  
81 responding to variation in oxygen supply [36]. Importantly, alleles in these genes that occur at high  
82 frequency in Tibetans but are rare elsewhere were also reported to be associated with lower Hb [33-35, 37]  
83 (but see [37-39]), consistent with many observations that unelevated hemoglobin concentration is  
84 characteristic of high-altitude Tibetans.

85           Because the impact of hypobaric hypoxia on human physiology cannot be modified through  
86 behavioral or cultural practices, indigenous high altitude populations provide a rare opportunity to observe  
87 human evolution in action. Here, we took advantage of this property to design a study aimed at

88 comprehensively dissecting adaptations to high altitude in a sample of ethnically Tibetan women, all  
89 citizens of Nepal who are indigenous to the country's northern border regions, who are lifelong residents at  
90 altitudes above 3,000 m. We tested for selective events that took place in the past, through indirect  
91 approaches that can detect both selective sweeps and polygenic adaptations, as well as for ongoing events,  
92 through the direct approach of mapping measures of reproductive success. Moreover, we collected  
93 phenotype data for three physiological variables, namely total hemoglobin concentration (Hb; g/dL),  
94 percent of oxygen saturation of hemoglobin (SaO<sub>2</sub>) and pulse. Hemoglobin variation, in particular, is a  
95 distinctive trait in the Tibetan pattern of adaptation [32]. To gain further insights into the physiological  
96 significance of this trait, we calculated and separately mapped the concentration of oxygenated  
97 hemoglobin ("oxyHb"), which is the relevant quantity for oxygen delivery to the tissues, and of  
98 deoxygenated hemoglobin ("deoxyHb"). We found a single genome-wide significant association signal  
99 for oxyHb at the *EPAS1* locus and several signals for reproductive traits and for deoxyHb. We detected  
100 strong selective sweeps indicating past selection at *EPAS1* and *EGLN1*, while finding little evidence for  
101 polygenic adaptation toward lower Hb. We detected signatures of polygenic adaptation for reproductive  
102 traits such as numbers of livebirths and offspring mortality, consistent with selective processes that are  
103 still ongoing in contemporary populations.

104

105

## 106 **Results**

107

### 108 *Genetic variation data of indigenous high-altitude individuals*

109 To investigate the genetic bases of high-altitude adaptations in Tibetan populations, we collected  
110 physiological and reproductive phenotype data and saliva samples of 1,008 indigenous ethnically Tibetan  
111 women living at 3,000-4,000 m in the Mustang and Gorkha districts of Nepal (see [Materials and Methods](#)).  
112 All Tibetan participants were chosen to be 39 years of age or older so that their recorded reproductive  
113 history would have minimal confounding due to unrealized reproduction. We also obtained saliva samples  
114 for DNA extraction and analysis from 103 Sherpa participants (including ten parents and offspring trios)  
115 from the high-altitude regions in the Khumbu district in Nepal. The Sherpa data were included in the  
116 reference panel for genotype imputations and in the polygenic adaptation tests, but not in GWAS (see  
117 below).

118 Genetic variation data of our study participants were generated by a combination of experimental  
119 and computational tools ([Figure 1](#); also see [Materials and Methods](#)). First, we generated novel genotype  
120 data for all participants using Illumina genotyping array platforms in multiple phases ([Supplementary](#)  
121 [Table 1](#)). Briefly, all Tibetans were first genotyped for about 300K markers on the HumanCore array with  
122 additional 2,553 custom markers to cover candidate regions, including the *EGLN1*, *EPAS1*, *HIF1A*

123 (hypoxia inducible factor 1 alpha subunit) and *NOS2* (nitric oxide synthase 2) genes. Then, we genotyped  
124 a subset of 344 unrelated Tibetans (allowing up to first cousins) and all 103 Sherpa for over 700K markers  
125 on the OmniExpress array; the same individuals were separately genotyped for two nonsynonymous SNPs  
126 in the *EGLN1* gene, rs12097901 and rs186996510 [40].

127 To augment publicly available reference panels for genotype imputation, we generated whole  
128 genome sequence data of 18 Sherpa and 35 Tibetans ([Supplementary Table 1](#)). Three Sherpa trios and four  
129 Tibetan mother-daughter duos were sequenced to high coverage (~ 20x), while the remaining 36  
130 individuals were genetically unrelated and sequenced to low coverage (~ 5x, [Supplementary Table 1](#)). For  
131 sequencing, we chose Tibetan and Sherpa individuals with no signature of recent admixture (See [Materials  
132 and Methods](#)). Adding six previously published Tibetan and Sherpa genomes [41, 42], we obtained phased  
133 genotypes of 59 individuals including 9,742,498 variants, of which 1,364,150 were not found in the 1000  
134 Genomes Project (1KGP) phase 3 data set [43]. Among the non-1KGP variants, 540,218 were included in  
135 dbSNP150 database, while 823,932 were not. Variant annotation using the ANNOVAR program [44]  
136 identified 8,679 nonsynonymous variants, 235 nonsense coding variants, and 126 splicing variants not  
137 present in the 1KGP ([Supplementary Table 2](#)). Among the non-1KGP variants, 29.46% and 24.14%  
138 occurred as singletons and doubletons, but 11.06% of them occurred at frequency 10% or higher  
139 ([Supplementary Table 2](#)). Using both the 1KGP phase 3 data and our high altitude sequence data as  
140 reference panels, we performed genotype imputation of all samples using the IMPUTE2 program [45] to  
141 generate the analysis-ready genotype data (see [Materials and Methods](#)).

142

### 143 ***GWAS reveals several associations with fertility phenotypes in Tibetans***

144 We performed GWAS of 23 phenotypes characterizing the reproductive history of our study  
145 participants using a linear mixed model-based approach as implemented in GEMMA [46]. We grouped  
146 our fertility phenotypes into two categories, “fertility counts” (e.g. number of live births) and “fertility  
147 proportions” (e.g. proportion of live births among pregnancies) ([Supplementary Table 3](#) describes the  
148 sample and summarizes the reproductive phenotypes). While the count phenotypes are more directly  
149 related to evolutionary fitness, they may be confounded by compensatory reproduction in case of a  
150 negative pregnancy outcome or by sociocultural factors that influence the count [47]. In contrast, the  
151 proportional variables are less affected by such factors and may provide information on the specific phase  
152 of the reproductive process affected by the associated genetic variation. Therefore, the counts and  
153 proportions may capture different aspects of the reproductive outcome. The GWAS was performed on the  
154 entire sample and on a subset referred to as continuously married (CM), that was composed of about 60%  
155 of participants who had been in a marital relationship throughout the ages of 25 to 40 (see [Materials and  
156 Methods](#)). This subset controls the variance in marital relationship status; on the other hand, the resulting  
157 smaller sample size reduces the power to detect significant associations.

158 For the fertility count phenotypes, we found 55 genome-wide significant genotype-phenotype  
159 associations clustered into five independent association signals across the genome (Table 1). First, our  
160 analysis of three fertility count phenotypes yielded genome-wide significant association peaks. Two  
161 intronic SNPs in the *CCDC141* (coiled-coil domain containing 141) gene, with the top SNP rs6711319,  
162 were associated both with the number of pregnancies ( $p = 2.10 \times 10^{-8}$ ) and with the number of live births ( $p$   
163  $= 2.89 \times 10^{-9}$ ; Figure 2 and Supplementary Figure 3). Fourteen SNPs between the *PAPOLA* (poly(A)  
164 polymerase alpha) and the *VRK1* (vaccinia related kinase 1) genes were associated with the number of  
165 stillbirths in the continuously married subset ( $p \geq 8.38 \times 10^{-9}$ ; Figure 2 and Supplementary Figure 3). The  
166 same set of SNPs also showed a suggestive association in the entire sample ( $p = 6.23 \times 10^{-5}$  to  $1.85 \times 10^{-4}$ ).  
167 No expression quantitative trait loci (eQTLs) were detected in the GTEx Project data in this peak region  
168 [48], making it hard to connect the associated SNPs with a specific gene.

169 For the fertility proportion phenotypes, two genome-wide significant association signals were  
170 detected (Table 1). Eight SNPs near *C6orf195*, with the top SNP rs9392394, were associated with the  
171 proportion of children who died before age 15 ( $p = 1.05 \times 10^{-8}$ ); SNPs within 15 kb of this peak had been  
172 associated with heart, blood pressure and reticulocyte traits in GWAS [49-51]. Twenty-nine SNPs near  
173 *CTBP2*, with the top SNP rs1459385, were associated with the same phenotype in the continuously  
174 married subset ( $p = 1.59 \times 10^{-8}$ ; Figure 2 and Supplementary Figure 3); other genes in this region include  
175 *TEX36* (testis expressed 36) and *EDRF1* (erythroid differentiation regulatory factor 1, which regulates the  
176 expression of globin genes). No eQTLs were detected in the GTEx Project data in these association  
177 regions.

178

### 179 ***EPASI, but not EGLNI, SNPs are associated with hemoglobin levels in Tibetan women***

180 The genetic bases of of Hb, SaO<sub>2</sub>, and pulse have been previously studied in outbred populations  
181 mainly of European ancestry [51-57]. Here, we performed GWAS of these key physiological phenotypes  
182 in Tibetans to potentially uncover population-specific genetic determinants. We derived two additional  
183 composite phenotypes: oxygenated hemoglobin concentration (“oxyHb”, defined as the product of Hb and  
184 SaO<sub>2</sub> divided by 100), and deoxygenated hemoglobin concentration (“deoxyHb”, defined as the difference  
185 between Hb and oxyHb). Consistent with findings from other studies, these women had an average  
186 hemoglobin concentration of  $13.8 \text{ g/dL} \pm 1.3 \text{ g/dL}$ . Supplementary Tables 3 and 4 describe the sample and  
187 summarize the phenotypic data. Each GWAS included about 3.5 million SNPs with minor allele  
188 frequency (maf)  $\geq 0.05$ .

189 Eight SNPs within a 17 kb intronic region of the *EPASI* gene were significantly associated with  
190 oxyHb ( $p \leq 5 \times 10^{-8}$  for all eight SNPs, with the top signal at rs372272284; Table 1, Figure 2 and  
191 Supplementary Figure 1). Hb and oxyHb were strongly correlated (Pearson  $r = 0.874$ ), and all eight SNPs  
192 were also strongly associated with Hb ( $p \leq 4.10 \times 10^{-7}$ ; Supplementary Table 5). This is the first report of



193 an association of the derived Tibetan *EPASI* alleles with a hemoglobin trait that reaches genome-wide  
194 significance levels. The results, including the estimated effect size of 0.332 g/dL per allele, support  
195 previous candidate gene studies for Hb [33, 34]. Due to strong linkage disequilibrium (LD), the signature  
196 of a selective sweep around the *EPASI* gene in Tibetans extends farther than 100 kb; however, our large  
197 sample size and dense genetic variation data allowed us to narrow down the association signal to a 17 kb  
198 region.

199 Conditioning on the genotype of rs372272284, no residual association with either Hb or oxyHb  
200 was observed in the *EPASI* locus ( $p \geq 0.770$ ; [Supplementary Figure 2](#)). This includes a previously  
201 identified “Tibetan-enriched” deletion (“TED”), 81kb downstream of the *EPASI* gene, present in Tibetans  
202 but not in the introgressed Denisovan haplotype [58]. TED is in LD with the eight significant SNPs in our  
203 data set (Pearson  $r = 0.771-0.783$ ), but its association with Hb and oxyHb was much weaker than our top  
204 SNPs ( $p = 1.64 \times 10^{-3}$  and  $3.09 \times 10^{-4}$ , respectively).

205 In contrast, we did not detect significant associations in the *EGLNI* gene. Two nonsynonymous  
206 variants in the *EGLNI* gene, rs12097901 and rs186996510, were previously shown to harbor strong  
207 signatures of selective sweep [37, 59]. An early study reported an association of the *EGLNI* haplotype  
208 (defined by a combination of three SNPs) with lower Hb in a sample of mixed gender with large effect  
209 size estimate 1.676 g/dL per allele [35]. However, two more recent studies, each with more than 500  
210 Tibetan participants, reported that the derived allele of rs186996510 was associated with lower Hb only in  
211 males [37, 39]. Similarly, an analysis of *EGLNI* SNPs in 3,008 Tibetans did not detect a significant  
212 association with Hb, and reported a larger effect size for males compared to females [38]. Consistent with  
213 the more recent evidence, we did not detect a significant association at either of the two SNPs with Hb ( $p$   
214  $\geq 0.224$ ) or with oxyHb ( $p \geq 0.268$ ) in our Tibetan sample, which includes only females. No association  
215 was detected when we either added menopause status, a female-specific covariate of Hb, as an additional  
216 covariate or confined our analysis to post-menopausal women ( $p \geq 0.641$ ), thus excluding it as an  
217 explanation for the lack of association in females. We calculated that our power to detect an association  
218 with a single test ( $\alpha = 0.05$ ) for the observed allele frequency of rs186996510 (0.336) and our sample size  
219 ( $N = 649$ ) was  $\geq 99\%$  for an effect size as low as 0.332 g/dL per allele, which is well below previous  
220 estimates ([Supplementary Table 6](#)). The reasons for the inconsistent findings regarding an association of  
221 *EGLNI*, an oxygen sensor in the oxygen homeostasis pathway, and hemoglobin concentration are  
222 unknown.

223 A recent study suggested an interaction between the effects of *EGLNI* and *EPASI* SNPs on Hb  
224 levels [60]. However, our data showed no significant interaction between the *EPASI* and *EGLNI* SNPs  
225 (rs372272284 and rs186996510, respectively) in the association with Hb ( $p = 0.613$ ).

226

227 ***Are lower Hb levels adaptive among Tibetan women?***

228           The women's reproductive history data offer a unique opportunity to ask if these selective sweep  
229 signals are associated with ongoing selection in contemporary Tibetans due to maternal factors and to  
230 estimate their selection coefficient. For each SNP, we calculated the population branch statistic (PBS),  
231 which measures the extent of allele frequency divergence on the lineage leading to a test population [34],  
232 in this case Tibetans. Consistent with previous studies, the *EPASI* (PBS = 1.073, rs73926264) and *EGLNI*  
233 (PBS = 0.797, rs186996510) loci harbored the highest PBS values (Supplementary Table 7). Table 2  
234 shows the association *p*-values for the top *EPASI* Hb/oxyHb GWAS SNP and the top PBS *EGLNI* SNP  
235 with all the fertility measures included in our GWAS. There is no association between *EGLNI* and *EPASI*  
236 SNPs and any of the direct measures of fitness, i.e. number of live births as well as number of children  
237 surviving at 1, 5 and 15 years. Nominal levels of significance are observed in some cases, but no test  
238 reaches significance after multiple test correction. Power calculations for the fertility count phenotypes  
239 suggest that we can detect such an association only if the associated selection coefficient is extremely high  
240 ( $\geq 6.6\%$  per allele for 80% power given a single test; Table 2). Previous estimates of the selection  
241 coefficient for both *EPASI* and *EGLNI*, 1.5% and 2.9%, respectively, are well below this range [37, 61].  
242 Therefore, these results are not inconsistent with the idea that these variants are advantageous.

243           The finding of *EPASI* alleles that are associated with lower Hb levels in Tibetans and carry a  
244 strong signature of positive natural selection led to the hypothesis that a dampening of the acclimatization  
245 response in Hb levels is adaptive in Tibetans [62]. Interestingly, *EPASI* was the only locus among the 36  
246 strongly associated with Hb ( $p \leq 10^{-4}$ ) to carry a strong signature of selective sweep. Importantly, although  
247 the *EPASI* SNPs are the only genome-wide significant association signal, they explain only 2.7% of the  
248 inter-individual variation in Hb suggesting that many other loci with effects on Hb exist in Tibetans.  
249 Consistent with the idea of polygenic inheritance for Hb, a recent GWAS revealed 140 loci with small  
250 effects contributing to Hb levels in a large sample of European ancestry [51]. Therefore, if lower Hb were  
251 adaptive, we would expect to observe signatures of polygenic adaptation at Hb-associated SNPs as a  
252 group, namely a trend towards lower frequencies of the Hb-increasing alleles at many unlinked SNPs in  
253 high altitude compared to low altitude samples. To test for this possibility, we used two methods  
254 specifically designed to detect consistent changes in the frequency of alleles at many unlinked Hb GWAS  
255 SNPs.

256           First, we calculated the mean allele frequency difference of Hb-increasing alleles between  
257 Tibetans or Sherpa and 1KGP CHB (Han Chinese in Beijing, China) across the 36 and 43 independent  
258 SNPs ( $p \leq 10^{-4}$ ) ascertained from our Tibetan Hb and oxyHb GWAS, respectively. Compared to 10,000  
259 sets of control SNPs [13], the Hb SNPs identified in Tibetans showed on average a lower frequency of  
260 Hb-increasing alleles in both Tibetans and Sherpa, suggesting selection favoring lower Hb levels (one-  
261 sided empirical-*p* = 0.047 and 0.018, respectively; Figure 3). The Tibetan oxyHb SNP set also showed a  
262 similar pattern (*p* = 0.102 and 0.046 for Tibetans and Sherpa, respectively; Supplementary Figure 4).



263 However, when the *EPASI* SNP rs372272284 was excluded, no difference between the Hb- or oxyHb-  
264 associated SNPs and control SNPs was observed ( $p \geq 0.211$ ; [Figure 3](#) and [Supplementary Figure 4](#)). Thus,  
265 the overall frequency difference seemed entirely due to the large frequency differentiation of the *EPASI*  
266 SNP: the Hb-increasing allele frequency was 0.253 and 0.990 for Tibetans and CHB, respectively.

267 GWAS SNP effect sizes have been shown to be correlated between European and East Asian  
268 populations [63], implying that SNPs identified in the large Hb GWAS in Europeans may be informative  
269 about the genetic bases of Hb variation in our Tibetan sample. Therefore, we also tested for polygenic  
270 adaptation using SNPs identified in a large European GWAS [51]; we used the 94 GWAS SNPs that were  
271 called in our data set. This set of SNPs did not include any *EPASI* SNPs, because the Tibetan *EPASI*  
272 haplotype is virtually absent outside Tibetan populations [64]. We found a trend towards lower  
273 frequencies of Hb-increasing alleles in both Tibetan and Sherpa, but this trend was significant only in  
274 Sherpa ( $p = 0.249$  and  $0.019$  for Tibetans and Sherpa, respectively; [Figure 3](#)).

275 We also applied a more recently developed set of tests for polygenic adaptation [14], using our  
276 data from Tibetans and Sherpa along with the 1KGP populations. This approach calculates a genetic value  
277 for each trait in each population by summing up the product of the frequency at each GWAS SNP and the  
278 effect size of that SNP and it compares GWAS-ascertained SNPs with a large number of control SNPs.  
279 Specifically, we focused on two tests. The “overdispersion” test asks if allele frequencies of the GWAS  
280 SNPs as a group show either unusually big differentiation across populations or unexpectedly strong  
281 correlation in the direction of change. The “outlier” test asks if the genetic value of a trait in a population  
282 or a group of populations is significantly different from that of the other populations. Excluding the  
283 *EPASI* SNP, neither the overdispersion test nor the outlier test for the high-altitude populations yielded  
284 results reaching nominal levels of significance ( $p_{\text{overdispersion}} = 0.695$  and  $p_{\text{outlier}} = 0.066$  with no multiple test  
285 correction) for oxyHb, or Hb ( $p_{\text{overdispersion}} = 0.201$  and  $p_{\text{outlier}} = 0.846$  with no multiple test correction)  
286 ([Figure 3](#), [Supplementary Figure 4](#) and [Supplementary Table 8](#)). In contrast (but consistent with the  
287 pairwise population test above), the outlier test was highly significant when the *EPASI* SNP was included  
288 ( $p \leq 0.0008$ ; [Figure 3](#), [Supplementary Figure 4](#) and [Supplementary Table 8](#)). Using the Hb associated  
289 SNPs from the European GWAS, we again observed a trend toward lower genetic values in the high  
290 altitude populations, but it did not reach levels of statistical significance ( $p_{\text{overdispersion}} = 0.433$  and  $p_{\text{outlier}} =$   
291  $0.110$  with no multiple test correction). Therefore, these analyses do not provide evidence that alleles  
292 associated with lower Hb levels were selected for, except for the *EPASI* locus. Given that the *EPASI*  
293 SNPs explain a small fraction of the total variation in Hb levels, these results raise the question of whether  
294 unelevated Hb *per se* was the adaptive trait in Tibetans.

295 Among the other physiological phenotypes, deoxyHb alone showed polygenic adaptation signals,  
296 as both the outlier and the pairwise difference tests were significant ( $p_{\text{outlier}} = 0.023$  and  $p_{\text{pairwise}} = 0.002$ ;  
297 [Supplementary Figure 4](#) and [Supplementary Table 8](#)). This result is not inconsistent with the lack of

298 evidence for polygenic adaptation toward lower Hb because this is not strongly correlated with deoxyHb  
299 ( $r = 0.441$  compared to that with oxyHb  $r = 0.874$ ). The alleles associated with higher deoxyHb in  
300 Tibetans were on average less common in Tibetans than in 1KGP CHB and the genetic values of deoxyHb  
301 in Tibetans and the Sherpa tended to be lower than those in 1KGP East Asians. Maximizing oxygen  
302 delivery while minimizing blood viscosity is likely to be beneficial in high-altitude environments;  
303 therefore, this advantage may underlie our signal of polygenic adaptation for lower deoxyHb. Neither  
304 SaO<sub>2</sub> nor pulse provided a significant result for any polygenic adaptation test ([Supplementary Table 8](#)).

305

### 306 ***Multiple reproductive fitness traits show evidence of polygenic adaptation in Tibetans***

307 The GWAS of reproductive traits allowed us to identify candidate variants that are currently being  
308 selected for in the sampled Tibetan population. In our results, none of the most strongly associated  
309 variants with reproductive outcomes showed strong signals of selective sweeps. However, if these variants  
310 indeed affect reproductive fitness, we might expect signals of polygenic adaptation. To test this idea, we  
311 used the same tests described above.

312 Interestingly, a number of reproductive traits showed strong signatures of polygenic adaptations  
313 based on the outlier test; the pairwise population difference test, which uses less information and hence is  
314 likely to be less powerful, gives broadly consistent results, although at lower levels of significance ([Table](#)  
315 [3](#), [Supplementary Figure 5](#) and [Supplementary Table 8](#)). Contrary to the case of Hb, we see significant  
316 polygenic adaptation signals in several measures directly related to reproductive fitness. Interestingly, the  
317 significant signals are observed for both the viability (e.g. the number of children born alive but died  
318 before 15 years;  $p_{\text{outlier}} = 0.000$ ,  $p_{\text{pairwise}} = 0.024$ ) and the fertility fitness component (e.g. the number of live  
319 births;  $p_{\text{outlier}} = 0.002$ ,  $p_{\text{pairwise}} = 0.002$ ). Furthermore, consistent with expectations, alleles increasing  
320 offspring mortality were selected against whereas those increasing offspring survival were positively  
321 selected for. A variable known to be directly linked to reproductive fitness, i.e. a woman's age at her first  
322 childbirth, is also under selection, with earlier ages being advantageous, as expected. Twinning appears to  
323 have been selected against in Tibetan women. Although twinning may increase fitness, it is also associated  
324 with increased risks to mother and offspring due to limits on women's ability to support adequate weight  
325 gain for two babies during the third trimester and to the lower birth weight of twins relative to singletons  
326 [65], which in turn is associated with higher neonatal and infant mortality.

327

### 328 ***Hb and pulse are correlated with aspects of reproductive success in Tibetan***

329 A previous analysis of this sample of Tibetan women found strong relationships between  
330 physiological traits and reproductive success in this Tibetan sample by using a large set of covariates,  
331 including physiological, sociocultural, and socioeconomic variables (e.g. relative wealth rank, type of  
332 marriage, and marital status) [47]. Because the present analyses used only a subset of covariates used in

333 the previous study, we tested for association of physiological traits and reproductive success by correcting  
334 for the same set of covariates used in our GWAS. Consistent with the previous analysis, we found that  
335 lower Hb correlated with a higher proportion of live births among pregnancies ( $p = 0.002$ ). We also found  
336 that Hb correlated positively with the numbers of stillbirths or miscarriages ( $p = 0.040$  and  $0.057$ ,  
337 respectively), as well as their proportions among pregnancies ( $p = 0.023$  and  $0.033$  for stillbirths and  
338 miscarriages, respectively).

339 Another interesting finding was the negative correlations between pulse and most of the fertility  
340 phenotypes, with the strongest correlations found with the numbers of pregnancies and livebirths ( $p =$   
341  $2.02 \times 10^{-5}$  and  $2.76 \times 10^{-5}$ , respectively; [Supplementary Table 9](#)). Pulse's negative association with a  
342 woman's age at her last pregnancy partially accounts for this strong correlation; however, the association  
343 between pulse and the number of pregnancies remained significant ( $p = 0.005$ ) after correcting for a  
344 woman's age at her last pregnancy, even if weaker. The pulse and fertility traits were previously shown to  
345 be marginally correlated if a larger set of covariates was included in the model ( $p = 0.130$  and  $0.069$  for  
346 the numbers of pregnancies and livebirths, respectively) [47].

347

348

## 349 Discussion

350 We identified several genome-wide significant associations with key physiological and fertility  
351 phenotypes in Tibetans ([Figure 2](#) and [Table 1](#)), by analyzing new dense genome-wide variation data of  
352 over 1,000 indigenous inhabitants above 3,000 m in Nepal ([Supplementary Table 1](#)). Using genetic  
353 variants identified in our GWAS, we found that several phenotypes showed signatures of polygenic  
354 adaptation towards better reproductive outcomes (e.g. the number of livebirths) ([Table 3](#), [Supplementary](#)  
355 [Figure 5](#) and [Supplementary Table 8](#)). Surprisingly, we did not find clear evidence for polygenic  
356 adaptation towards low Hb in Tibetans beyond a link through the *EPAS1* gene, even though we confirmed  
357 a correlation between low Hb and better reproductive outcomes. Because Hb concentration is a polygenic  
358 trait, these results raise the question of whether lower hemoglobin is causally related to higher  
359 reproductive fitness.

360 Our GWAS of fertility phenotypes discovered three genome-wide significant associations ([Table](#)  
361 [1](#) and [Supplementary Figure 3](#)). Those signals lie in or near genes of potential biological relevance. First,  
362 the association peak for the number of pregnancies and of livebirths is located within an intron of the  
363 *CCDC141* gene ([Figure 2](#)), which is expressed in the heart and had been linked to a rare form of  
364 hypogonadotropic hypogonadism [66]. This gene is an immediate neighbor of the *TTN* (titin) gene, which  
365 codes for a major component of cardiac muscle and has been linked to idiopathic dilated and peripartum  
366 cardiomyopathy and cardiac remodeling [67, 68]. Genetic variants within 6 kb from our association peak  
367 were reported to be associated with cardiac phenotypes, such as heart rate [52, 69]. Although these GWAS

368 signals were not associated with pulse, we hypothesize that they influence heart function, which in turn  
369 may affect pregnancy outcomes in the extreme high-altitude environments. The observed negative  
370 correlation between pulse and the number of livebirths is consistent with this idea.

371 Second, the top SNP in chromosome 14 associated with the number of stillbirths is 99 kb away  
372 from the *PAPOLA* gene encoding a poly-A tail polymerase that affects mRNA stability and nuclear export.  
373 Intriguingly, the product of this gene is inhibited by cordycepin, an adenosine analog (3' deoxyadenosine),  
374 found in nature in a fungus, “Yartsa gunbu” or *Cordyceps sinensis*, which is native to the highlands of  
375 Nepal and Tibet. Harvest of this fungus for sale primarily in China is a major source of household revenue  
376 in the Gorkha district, from where about one third of our participants were recruited. Although it is not a  
377 species consumed by ethnic Tibetan women in this region, our results raise the possibility that the  
378 *PAPOLA* SNPs may affect the stillbirth phenotype by interacting with an exposure to *C. sinensis* during  
379 pregnancy. An alternative and equally likely explanation is that these SNPs influence reproductive  
380 outcomes through mechanisms not involving cordycepin exposure, for example by affecting mRNA levels  
381 of key genes involved in inflammatory processes, as suggested in knockdown experiments of the *PAPOLA*  
382 gene [70], or through mechanisms involving other nearby genes.

383 The availability of reproductive history data in a population with little or no birth control offers  
384 unique opportunities for elucidating the adaptation process. Indeed, the ethnic Tibetan women sampled in  
385 this study have high birth rates (the number of livebirths =  $5.38 \pm 2.79$ ; mean  $\pm$  1 standard deviation) and  
386 live in a mostly traditional society, where modern medical care, including in some regions contraception,  
387 has been introduced only very recently [47]. The reproductive data allowed testing for a relationship  
388 between genetic or phenotypic variation and fitness differential. Interestingly, genetic variation carrying  
389 well-established signals of selective sweeps, i.e. *EGLN1* and *EPASI* SNPs, was not associated with  
390 reproductive success (Table 2 and Supplementary Table 9). A likely explanation for these observations is  
391 that we do not have power to detect an association: we estimate that only very strong positive selection  
392 (per-allele selection coefficient  $\geq 6.6\%$ ) can be detected given our sample size (Table 2). However, we did  
393 detect significant signals of polygenic adaptations using the SNPs identified in our GWAS of fertility  
394 variables. Importantly, alleles increasing survival variables were selected for while those increasing death  
395 variables were selected against, as expected (Table 3 and Supplementary Table 8). These findings connect  
396 a selection signal identified by using a population genetics approach and measures of reproductive success  
397 and point to ongoing natural selection.

398 An attenuated erythropoietin and Hb concentration response to hypobaric hypoxia is a hallmark  
399 phenotype of the “Tibetan pattern” of high-altitude adaptations, which is markedly different from that of  
400 Andean highlanders [32, 71, 72]. The low prevalence among Tibetans of diseases associated with elevated  
401 Hb concentration, such as chronic mountain sickness [73], and a signal of selective sweep in the *EPASI*  
402 gene [33, 34] have led to the hypothesis that unelevated Hb is adaptive in Tibetan highlanders [62]; this

403 hypothesis was also substantiated by the correlation between low Hb and better reproductive outcomes in  
404 our Tibetan sample [47]. Our GWAS provides the first genome-level support for the association between  
405 the Tibetan *EPASI* haplotype and low oxyHb, which correlates highly with total Hb. Interestingly, the  
406 association was stronger for oxyHb than for total Hb (Table 1 and Supplementary Table 5), while it was  
407 not significant for deoxyHb ( $p = 0.883$  for rs372272284). This observation raises the possibility that it is  
408 the oxygen-carrying portion of total Hb that drives the well-replicated association between *EPASI* SNPs  
409 and Hb. We also found that SNPs associated with Hb, either in our own GWAS in Tibetans or in a much  
410 larger one in Europeans [51], did not show polygenic adaptation signals in our Tibetan sample, if the  
411 *EPASI* SNP was excluded from the analysis (Figure 3). Intriguingly, the Sherpa, who are closely related  
412 to other Tibetan populations and also have unelevated Hb levels [41, 71, 74], show a significant trend  
413 towards lower frequencies of the Hb-increasing alleles in one of the two polygenic adaptation tests ( $p =$   
414  $0.019$ ), despite the smaller sample size compared to our Tibetans. Based on our estimate of 0.386 g/dL per  
415 allele, and a mean allele frequency difference of 0.743 between high and lowlanders, we calculated that  
416 the *EPASI* SNPs can explain 52% of the 1.1 g/dL difference reported in [75] between Tibetan and Han  
417 Chinese women in the same age range. In our sample, the *EPASI* SNP explain only 2.7% of inter-  
418 individual variation in Hb: therefore, almost all within-population (97.3%) as well as a substantial portion  
419 of between-population (48%) variation remains unexplained.

420 Several scenarios could account for these results. Incomplete power in the Tibetan GWAS and/or  
421 in the polygenic adaptation tests could underlie the lack of clear evidence for polygenic adaptation for  
422 lower Hb levels, although we had sufficient power to detect polygenic adaptation signals for several other  
423 traits in the same samples. The lack of evidence supporting low Hb as the selected trait in Tibetans stands  
424 in stark contrast with the strong selective sweep signal at *EPASI* and with the significant evidence for  
425 polygenic adaptations toward lower deoxyHb. This finding raises the question of whether unelevated Hb  
426 was the true target of selection in Tibetans rather than a mere correlate of the true adaptive trait. This  
427 scenario would be consistent with the observed correlation between low Hb and better reproductive  
428 outcomes because pleiotropy can induce a non-causal association between phenotypes. A recent study  
429 showed that the same *EPASI* SNP that is associated with Hb and other hematological traits is also  
430 associated with uric acid levels [38], suggesting that indeed SNPs in *EPASI*, a transcription factor with  
431 dozens of target genes, may affect multiple, seemingly unrelated phenotypes. Interestingly, the peak of our  
432 association signal for oxyHb at *EPASI* spans active enhancer (H3K27Ac) marks in human umbilical  
433 endothelial cells, as detected by the ENCODE project [76]. Therefore, it could be speculated that the SNPs  
434 that influence variation in oxyHb/Hb levels also affect endothelial function and vascularization, with  
435 beneficial effects in oxygen delivery at high altitudes. These findings suggest that the WHO altitude-  
436 adjusted elevated hemoglobin cut-off for detecting iron-deficiency anemia [77] may be inappropriate for



437 use among Tibetan women, a result of this work that has public health implications and that warrants  
438 further research.

439 This study was designed to extend the genetic study of human local adaptation beyond selective  
440 sweeps and candidate gene associations, by collecting genotype and physiological phenotype and  
441 reproductive history data for a large group of indigenous high-altitude Tibetan women in Nepal. Using  
442 this data set, we successfully identified several new genome-wide associations and signatures of polygenic  
443 adaptations. Our sample size of 1,000 participants is remarkably large for the genetic study of populations  
444 living in remote locations in a traditional society, but we acknowledge that is rather small for a modern-  
445 day GWAS. The census population size of ethnic Tibetans of villages in this region set the ultimate  
446 constraint on our sample size, which was obtained by recruiting virtually all inhabitants fitting our  
447 inclusion criteria. Despite this constraint, this study shows the necessity to study phenotypes of locally  
448 adapted populations in their native environments to correctly identify the adaptive phenotypes. With ever  
449 increasing throughput to generate genetic and phenotypic variation data, in-depth phenotyping of  
450 potentially adaptive features will help better understand how Tibetans and other populations living in  
451 extreme environments have adapted to their habitats.

452

453

## 454 **Materials and Methods**

455

### 456 *Sample information*

457 A total of 1,008 ethnic Tibetan participants were recruited from high-altitude villages in Mustang  
458 and Ghoroka districts in Nepal in the spring and summer of 2012. All participants were women of age 39 or  
459 older and lifelong residents above 3000 m of altitude. The study communities in Nepal lie on the southern  
460 aspects of the Tibetan Plateau. Although they are citizens of Nepal, local people speak Tibetan dialects,  
461 practice forms of religion and social organization akin to those across the Tibetan Plateau, and retain the  
462 characteristic agro-pastoral and trading mode of subsistence common among highland Tibetans [47]. An  
463 additional 103 Sherpa participants were recruited from high-altitude villages in the Khumbu district in  
464 Nepal in the summer of 2014. Most of the Sherpa participants were women of age 39 or older. We  
465 collected saliva samples of husbands and children for 12 of them. Saliva samples were collected in the  
466 field using OG-500 Oragene DNA collection kits (DNA Genotek Inc., Ottawa, ON, Canada) and genomic  
467 DNA (gDNA) were extracted using the prepIT-L2P reagents (DNA Genotek Inc) following the  
468 manufacturer's protocol. Blood hemoglobin concentration (Hb), percent arterial blood oxygen saturation  
469 (SaO<sub>2</sub>), and pulse rate (pulse/minute) were measured as described in Cho et al. [47]. Two additional  
470 phenotypes, oxygenated and deoxygenated hemoglobin concentrations (oxyHb and deoxyHb,  
471 respectively), were calculated from Hb and SaO<sub>2</sub> as follows:  $\text{oxyHb} = \text{Hb} \times \text{SaO}_2 / 100$  and  $\text{deoxyHb} = \text{Hb}$



472 – oxyHb. For each participant, an interview session was held to retrieve detailed reproductive history as  
473 well as to collect other potential covariates. The study protocol was approved by the institutional review  
474 boards at Case Western Reserve University, Dartmouth College, Washington University at St. Louis, by  
475 the Nepal Health Research Council and by the Oxford Tropical Research Centre Ethics Committee. A  
476 written informed consent was signed by each participant. A summary of the Tibetan samples and their  
477 phenotype measurements are presented in [Supplementary Table 4](#). Detailed description of the Tibetan  
478 samples, the phenotype and covariate data collection was published in Cho et al. [47].

479

#### 480 ***Array genotyping***

481 We generated new genome-wide genotype data for a total of 1,134 individuals indigenous to the  
482 high-altitude regions in the Himalayas in Nepal, including 1,001 ethnic Tibetans from the present study  
483 and 103 Sherpa ([Supplementary Table 1](#)). Array genotyping was performed in two phases. First, all  
484 Tibetan individuals were genotyped on 301,299 biallelic markers using the customized Illumina  
485 HumanCore-12 v1.0A array, which includes probes for additional 2,553 markers from 19 genomic loci  
486 presumed adaptive in Tibetans including the *EPAS1*, *EGLN1*, *HIF1A* and *NOS2* genes. Then, a subset of  
487 344 unrelated Tibetans from the present study and all 103 Sherpa individuals were genotyped on 716,503  
488 markers using the Illumina OmniExpress-24 v1.0 array to obtain denser genome-wide variation data. For  
489 each array platform, genotypes were called using the genotyping module in the Illumina Genome Studio  
490 with default parameters (GenCall score threshold 0.15). Previously defined clusters, downloadable from  
491 the Illumina website, were applied for genotype calling. For the 2,553 custom markers we added to the  
492 HumanCore array, we retrieved intensity data from the Illumina Genome Studio and performed genotype  
493 calling using the OptiCall v0.6.4 [78]. For 344 Tibetans genotyped on both Illumina platforms, we used  
494 genotype calls from the HumanCore array for the overlapping 253K markers. Genotype calls from the two  
495 platforms were highly concordant, with the average 99.98% concordance.

496

#### 497 ***Genotyping of nonsynonymous EGLN1 SNPs***

498 We separately genotyped two non-synonymous SNPs in the *EGLN1* gene, rs12097901 and  
499 rs188966510, in the set of 344 unrelated Tibetans. We used Epicenter FailSafe™ PCR system with the  
500 manufacturer's recommended condition in buffers G and H, instead of using standard TAQ polymerases.  
501 We generated a 1,025 bp PCR fragment in an 11 ul reaction volume using a previously published primer  
502 pair PHD2-X1F (CCCCTATCTCTCTCCCCG) and PHD2-X1R (CCTGTCCAGCACAAACCC) [59].  
503 These PCR products were sequenced using BigDye® Terminator v3.1 cycle sequencing kit and the  
504 PHD2-X1F primer in an Applied Biosystems™ 3730XL DNA Analyzer. In a few cases where initial  
505 amplification failed, samples were diluted 4x in water, which in most cases allowed successful subsequent  
506 amplification. Genotypes were scored manually from chromatograms.

507

### 508 *Sample selection for whole genome sequencing*

509 We generated novel whole genome sequence data for 18 Sherpa and 35 Tibetans from the present  
510 study, all from Nepal. Seventeen individuals were sampled with known familial relationships (four  
511 Tibetans mother-daughter duos and three Sherpa parents-offspring trios), and sequenced to high-coverage  
512 (around 20x autosomal coverages) to generate high quality phased genome sequences. The remaining 36  
513 individuals were chosen to be unrelated and sequenced to low-coverage targeting 5x autosomal coverage.

514 For Sherpa, we began with 172 individuals, including 103 newly genotyped in this study and 69  
515 previously published [41], and chose a subset of 101 unrelated individuals allowing first cousins.  
516 Coefficients of relatedness were calculated using PLINK v1.07 [79]. Then, we estimated population  
517 structure in these unrelated Sherpa, together with 30 Tibetans from near Lhasa [80] and 103 1KGP CHB,  
518 using an unsupervised genetic clustering algorithm in ADMIXTURE v1.22 [81]. Using estimates from  
519  $K=2$ , we chose 51 Sherpa with > 95% of their ancestry from a component enriched in Sherpa and Tibetans  
520 (the remaining portion come from an ancestry representing CHB-related low altitude East Asians). Among  
521 them, we chose three pairs of couples with their offspring and 9 additional unrelated individuals for high-  
522 and low-coverage sequencing, respectively.

523 For Tibetans, we ran ADMIXTURE with  $K=3$  in a supervised mode, with 103 1KGP CHB, 103  
524 1KGP GIH (Gujarati Indians in Houston, Texas) and the 51 unrelated Sherpa as three reference groups.  
525 Pairwise relatedness was then calculated with the ADMIXTURE output using the RelateAdmix v0.08,  
526 controlling for population structure due to admixture [82]. Among individuals with minimum South Asian  
527 ancestry (< 1%), represented by GIH, we chose four pairs of mother-daughter duos of Tibetans from the  
528 present study and 27 unrelated individuals for high- and low-coverage sequencing, respectively.

529

### 530 *Whole genome sequencing*

531 Single-barcoded libraries for Illumina sequencing were constructed using the TruSeq library  
532 preparation kit. Libraries were pooled into multiple batches and sequenced in the Illumina HiSeq 2500 and  
533 4000 machines for paired-end (PE) 100 and 125 bp designs ([Supplementary Table 1](#)). Sequence reads  
534 were demultiplexed with no mismatch in 6-bp barcode sequence allowed. Reads were mapped to the  
535 human reference genome sequences (hg19) downloaded from  
536 <http://hgdownload.soe.ucsc.edu/goldenPath/hg19/chromosomes/>, using BWA backtrack v0.7.4 with -q15  
537 option [83]. PCR and optical duplicate reads were marked using Picard tools v1.98  
538 (<http://broadinstitute.github.io/picard/>) and were excluded from further analysis. Local realignment around  
539 indels and base quality score recalibration were performed using the GenomeAnalysis ToolKit (GATK)  
540 v2.8-1, following the best practice pipeline [84-86]. Finally, analysis-ready BAM files for variant

541 discovery and genotype calling were produced using Samtools v1.2 [87] by filtering out reads with Phred-  
542 scaled mapping quality lower than 30.

543 LD-aware variant and genotype calling was performed using the GotCloud pipeline [88] with  
544 default parameters. The analysis-ready BAM files of 53 newly sequenced individuals and 6 previously  
545 reported ones, four Sherpa and two Nepali Tibetans [41, 42], were provided to the pipeline together.

546

### 547 *Imputation of array genotype data*

548 We performed genotype imputation of Tibetan and Sherpa samples, which were array-genotyped  
549 either in the present or in our previous study [41] ([Supplementary Table 1](#)). For each array genotyping  
550 platform, low quality markers and samples were filtered out by applying the following filters: per-marker  
551 missing rate  $\leq 0.05$ , Hardy-Weinberg equilibrium (HWE)  $p$ -value  $\geq 0.00001$  and per-individual missing  
552 rate  $\leq 0.03$ . Strand-ambiguous (A/T and G/C) SNPs were removed and only SNPs in autosomes or X  
553 chromosome were retained for imputation. The filtering process was performed using PLINK v1.90 [89].  
554 Genotype imputation was performed for each set of samples separately using IMPUTE2 v2.3.2 [45]. We  
555 used both our phased genotype calls of 59 high-altitude samples and the 1KGP phase 3 reference data set,  
556 downloadable from [https://mathgen.stats.ox.ac.uk/impute/1000GP\\_Phase3.html](https://mathgen.stats.ox.ac.uk/impute/1000GP_Phase3.html), as imputation references  
557 by merging them with “-merge\_ref\_panels” flag in IMPUTE2. For other parameters, we used default  
558 values set by the program. Following imputation, genotypes with posterior probability  $\geq 0.9$  were accepted.  
559 Genotypes were assumed to be missing if none of three possible genotypes reached posterior probability  
560 threshold of 0.9. Then, we conducted an additional round of quality control by removing SNPs with  
561 missing rate higher than 0.05 or HWE  $p$ -value smaller than  $10^{-6}$ .

562

### 563 *Genome-wide association analysis*

564 Among 1,001 successfully genotyped and imputed Tibetan women, 991 individuals were included  
565 in our genome-wide association analysis (GWAS). Four individuals were excluded from the analysis  
566 because they were born below 3,000 m). Another individual was excluded from the analysis was a genetic  
567 outlier who clustered with individuals from the Indian subcontinent. The other five were excluded either  
568 because they had inconsistent reproductive record or because they were nuns who became celibate during  
569 their reproductive years.

570 For physiological phenotypes, we chose relevant covariates by performing a stepwise model  
571 selection, allowing removal of a single covariate each step if likelihood ratio test (LRT)  $p$ -value obtained  
572 from the “lrtest” function in the R “lmtest” library was bigger than 0.05. The final sets of chosen  
573 covariates for physiological covariates are listed in [Supplementary Table 3](#). For fertility phenotypes, we  
574 used an *a priori* chosen set of four covariates: age, subdistrict, use of contraception and “continuously  
575 married (CM)” status. Use of contraception was categorized into three classes: never used, previously

576 used, and currently in use. “Continuously married” status is a binary variable defined as being in a marital  
577 relationship throughout the ages of 25 and 40. It includes two who had experienced less than two years of  
578 gap before re-marriage following divorce or death of the husband. [Supplementary Table 4](#) presents a  
579 summary of these covariates. A full list of GWAS phenotypes and their description are provided in  
580 [Supplementary Table 3](#).

581 GWAS was performed using GEMMA v0.94.1 [46]. Univariate linear mixed model (LMM) as  
582 implemented in GEMMA was used to control for both population structure and genetic relatedness [46].  
583 For each phenotype, we first removed individuals with no information on either the focal phenotype or its  
584 associated covariates. Second, we kept SNPs with  $\text{maf} \geq 5\%$  for the chosen subset of individuals. Third,  
585 the standardized genetic covariance matrix was calculated from this data set and was used for LMM. Last,  
586 GWAS was run controlling for the above covariates. For continuous and count data, we provided raw  
587 phenotype data together with covariates to the program. For the binomial data, we fitted a binomial  
588 regression model using the “glm” function in R, calculated the difference between the observed odds and  
589 the odds of the fitted value, and used this residual as a GWAS phenotype. LRT  $p$ -values from GEMMA  
590 were used to assess significance of genetic association.  $P$ -values of the full and subsample sets were  
591 highly correlated for each fertility phenotype (Pearson  $r = 0.36 - 0.74$  with  $p < 10^{-15}$  for  $-\log_{10}$   
592 transformed  $p$ -values).

593

#### 594 *Genomic scans for selective sweeps*

595 To summarize genomic signatures of recent selective sweeps in Tibetans, we calculated the  
596 population branch statistic (PBS) [34] across the Tibetan genome. We used the 344 unrelated Tibetans  
597 genotyped using the Illumina OmniExpress array. For the comparison group and outgroup, we used 1KGP  
598 phase 3 CHB and CEU (CEPH Utah residents with Northern and Western European ancestry) respectively.  
599 We calculated PBS following Weir and Cockerham’s definition of pairwise  $F_{ST}$  [90] using a custom  
600 python script for markers with  $\text{maf} \geq 0.05$  in either Tibetans or CHB. Only female individuals from the  
601 1KGP data were used to calculate statistics for the X chromosome. After calculating PBS, we summarized  
602 the signal for 100 kb windows sliding by 25 kb, by calculating a pseudo-binomial  $p$ -value  $P$  defined as:

$$603 \quad P = \Pr(X \geq n_{\text{top}}); X \sim \text{Binomial}(n_{\text{total}}, p = 0.001)$$

604 where  $n_{\text{top}}$  and  $n_{\text{total}}$  represent the number of global top 0.1% SNPs and the number of total SNPs in each  
605 window. Cutoffs for the top 0.1% PBS value were calculated separately for the autosomes and the X  
606 chromosome.

607

#### 608 *Polygenic adaptation signals*

609 To detect signatures of polygenic adaptation, we investigated systematic changes in allele  
610 frequencies of SNPs associated with each phenotype. For all of Tibetan GWAS phenotypes, we first took

611 all SNPs with  $p \leq 10^{-4}$  and lumped them into peaks by allowing maximum inter-SNP distance of 200 kb.  
612 Finally, we chose one SNP with the smallest association  $p$ -value for each peak to retrieve a set of  
613 independently associated SNPs. We also retrieved a set of SNPs associated with blood hemoglobin level  
614 (Hb) using summary statistics from a published large-scale GWAS meta-analysis [57]. For this, we first  
615 confined markers to those overlapping with our Tibetan data and applied a more stringent cutoff of  $p \leq 10^{-5}$   
616 and trimmed markers by removing one with larger association  $p$ -value from each pair of SNPs if  $r^2 > 0.2$   
617 in 1KGP CEU.

618 After retrieving phenotype-associated SNPs with their effect size, we first compared mean  
619 frequency difference of trait-increasing alleles between Tibetans and 1KGP CHB. Following [13], we  
620 sampled 10,000 sets of random SNPs, where each set contained an equal number of SNPs as the GWAS  
621 SNPs matched one-to-one by mean minor allele frequency in bins of size 0.02. The empirical distribution  
622 of mean frequency difference of trait-increasing alleles was compared to the observed value from the  
623 GWAS SNPs and the empirical one-sided  $p$ -value was calculated as the proportion of random SNP sets  
624 with their mean allele frequency difference equal to or more extreme than the observed one.

625 We also looked into comprehensive signatures of polygenic adaptation using a machinery  
626 introduced by [14]. For this, we used allele frequency of 26 populations in the 1KGP phase 3 data set  
627 overlapping with the Tibetan data. We first sampled random SNPs matching each of the GWAS SNPs by  
628 minor allele frequency bin of size 0.02 in the GWAS population and by the B-value bin of size 100  
629 (values ranging from 0 to 1,000) [91]. We sampled up to several thousands of random SNPs per GWAS  
630 SNP to obtain around 100,000 random SNPs in total. These random SNPs were used for calculating the  
631 genetic covariance matrix of populations and for generating 5,000 sets of matched random SNPs.

632

### 633 ***Connecting selection coefficient and the statistical power to detect genotype-phenotype association***

634 To estimate the strength of positive selection to generate difference in fertility count phenotypes  
635 large enough to be detected within a single generation, we assumed a simple additive model. That is,  
636 genotypes with 0, 1 and 2 adaptive alleles, with population frequency  $p$ , have the mean absolute fitness  $W_0$ ,  
637  $W_0(1+s)$  and  $W_0(1+2s)$ . Using the observed mean phenotype value,  $W_m$ , we can get the per-allele effect  
638 size  $sW_0$  as a function of  $s$ ,  $W_m$  and  $p$ :

$$sW_0 = \frac{sW_m}{1 + 2sp}$$

639 Then, the effect size was standardized to the unit of standard deviation, using the observed standard  
640 deviation of the phenotype. For the standardized effect size, which is a function of selection coefficient  $s$ ,  
641 the statistical power to detect association was calculated using the “pwr.r.test” function in the R package  
642 “pwr”.

643

644  
645 **Acknowledgements**  
646 Sample collection took place during the April to August 2012 with support from the National Science  
647 Foundation (1153911). Additional funding was granted through the Rockefeller Center and the Claire  
648 Garber Goodman Fund, both at Dartmouth College. Genotyping and the statistical analyses were done  
649 with support from the National Institutes of Health (1R01HL119577 to AD) and from the National  
650 Science Foundation (1153911 to CMB). We are grateful to the Nepal Health Research Council for  
651 reviewing and approving this project. We would like to thank our fieldwork assistants for their hard work  
652 and dedication to the project. In Gorkha District, they were Ang Tsering, Jangchuk Sangmo, Tinley  
653 Tsering, Tsechu Dolma, and Tsering Buti. In Mustang District, they were Kunzom Thakuri, Karma  
654 Chodron Gurung, ‘Apu’ Karma Chodron Gurung, Diki Dolkar Gurung, Yangjin Bista, Karchung Mentok  
655 Gurung, and Tashi Bista. We thank Jonathan Pritchard and Molly Przeworski for helpful comments on  
656 earlier versions of the manuscript. We are grateful to William Buikema for optimizing and performing the  
657 *EGLNI* genotyping assays and, more generally to the University of Chicago Genomics Core Facility  
658 supported by a Cancer Center Grant (P30 CA014599).  
659



## 660 References

- 661
- 662 1. Roberts DF (1953) Body weight, race and climate. *Am J Phys Anthropol* 11: 533-558.
  - 663 2. Katzmarzyk PT and Leonard WR (1998) Climatic influences on human body size and proportions:  
664 ecological adaptations and secular trends. *Am J Phys Anthropol* 106: 483-503.
  - 665 3. Hoekstra HE, Hoekstra JM, Berrigan D, Vignieri SN, Hoang A, Hill CE et al. (2001) Strength and  
666 tempo of directional selection in the wild. *Proc Natl Acad Sci USA* 98: 9157-9160.
  - 667 4. Savolainen O, Lascoux M and Merila J (2013) Ecological genomics of local adaptation. *Nat Rev*  
668 *Genet* 14: 807-820.
  - 669 5. Haasl RJ and Payseur BA (2016) Fifteen years of genomewide scans for selection: trends, lessons  
670 and unaddressed genetic sources of complication. *Mol Ecol* 25: 5-23.
  - 671 6. Sabeti PC, Varilly P, Fry B, Lohmueller J, Hostetter E, Cotsapas C et al. (2007) Genome-wide  
672 detection and characterization of positive selection in human populations. *Nature* 449: 913-918.
  - 673 7. Voight BF, Kudaravalli S, Wen X and Pritchard JK (2006) A map of recent positive selection in  
674 the human genome. *PLoS Biol* 4: e72.
  - 675 8. Pickrell JK, Coop G, Novembre J, Kudaravalli S, Li JZ, Absher D et al. (2009) Signals of recent  
676 positive selection in a worldwide sample of human populations. *Genome Res* 19: 826-837.
  - 677 9. Hancock AM, Witonsky DB, Alkorta-Aranburu G, Beall CM, Gebremedhin A, Sukernik R et al.  
678 (2011) Adaptations to climate-mediated selective pressures in humans. *PLoS Genet* 7: e1001375.
  - 679 10. Pritchard JK and Di Rienzo A (2010) Adaptation—not by sweeps alone. *Nat Rev Genet* 11: 665-  
680 667.
  - 681 11. Pritchard JK, Pickrell JK and Coop G (2010) The genetics of human adaptation: hard sweeps, soft  
682 sweeps, and polygenic adaptation. *Curr Biol* 20: R208-R215.
  - 683 12. Boyle EA, Li YI and Pritchard JK (2017) An Expanded View of Complex Traits: From Polygenic  
684 to Omnigenic. *Cell* 169: 1177-1186.
  - 685 13. Turchin MC, Chiang CW, Palmer CD, Sankararaman S, Reich D, Hirschhorn JN et al. (2012)  
686 Evidence of widespread selection on standing variation in Europe at height-associated SNPs. *Nat*  
687 *Genet* 44: 1015-1019.
  - 688 14. Berg JJ and Coop G (2014) A population genetic signal of polygenic adaptation. *PLoS Genet* 10:  
689 e1004412.
  - 690 15. Field Y, Boyle EA, Telis N, Gao Z, Gaulton KJ, Golan D et al. (2016) Detection of human  
691 adaptation during the past 2000 years. *Science* 354: 760-764.
  - 692 16. Zoledziewska M, Sidore C, Chiang CW, Sanna S, Mulas A, Steri M et al. (2015) Height-reducing  
693 variants and selection for short stature in Sardinia. *Nat Genet* 47: 1352-1356.
  - 694 17. Sabeti P, Schaffner S, Fry B, Lohmueller J, Varilly P, Shamovsky O et al. (2006) Positive natural  
695 selection in the human lineage. *Science* 312: 1614-1620.
  - 696 18. Fu W and Akey JM (2013) Selection and adaptation in the human genome. *Annu Rev Genom Hum*  
697 *G* 14: 467-489.
  - 698 19. Teshima KM, Coop G and Przeworski M (2006) How reliable are empirical genomic scans for  
699 selective sweeps? *Genome Res* 16: 702-712.
  - 700 20. Stearns SC, Byars SG, Govindaraju DR and Ewbank D (2010) Measuring selection in  
701 contemporary human populations. *Nat Rev Genet* 11: 611-622.
  - 702 21. Williams TN, Wambua S, Uyoga S, Macharia A, Mwacharo JK, Newton CR et al. (2005) Both  
703 heterozygous and homozygous  $\alpha^+$  thalassemias protect against severe and fatal *Plasmodium*  
704 *falciparum* malaria on the coast of Kenya. *Blood* 106: 368-371.
  - 705 22. Pilia G, Chen W-M, Scuteri A, Orrú M, Albai G, Dei M et al. (2006) Heritability of  
706 cardiovascular and personality traits in 6,148 Sardinians. *PLoS Genet* 2: e132.

- 707 23. Mostafavi H, Berisa T, Day F, Perry J, Przeworski M and Pickrell JK (2017) Identifying genetic  
708 variants that affect viability in large cohorts. *bioRxiv*: 085969.
- 709 24. Barban N, Jansen R, De Vlaming R, Vaez A, Mandemakers JJ, Tropf FC et al. (2016) Genome-  
710 wide analysis identifies 12 loci influencing human reproductive behavior. *Nat Genet* 48: 1462-  
711 1472.
- 712 25. Mbarek H, Steinberg S, Nyholt DR, Gordon SD, Miller MB, McRae AF et al. (2016)  
713 Identification of common genetic variants influencing spontaneous dizygotic twinning and female  
714 fertility. *Am J Hum Genet* 98: 898-908.
- 715 26. Brown EA, Ruvolo M and Sabeti PC (2013) Many ways to die, one way to arrive: how selection  
716 acts through pregnancy. *Trends Genet* 29: 585-592.
- 717 27. Aldenderfer M (2006) Modelling plateau peoples: the early human use of the world's high  
718 plateaux. *World Archaeol* 38: 357-370.
- 719 28. Beall CM (2006) Andean, Tibetan, and Ethiopian patterns of adaptation to high-altitude hypoxia.  
720 *Integr Comp Biol* 46: 18-24.
- 721 29. Beall C and Reichsman A (1984) Hemoglobin levels in a Himalayan high altitude population. *Am*  
722 *J Phys Anthropol* 63: 301-306.
- 723 30. Beall CM, Decker MJ, Brittenham GM, Kushner I, Gebremedhin A and Strohl KP (2002) An  
724 Ethiopian pattern of human adaptation to high-altitude hypoxia. *Proc Natl Acad Sci USA* 99:  
725 17215-17218.
- 726 31. Beall CM (1982) A comparison of chest morphology in high altitude Asian and Andean  
727 populations. *Hum Biol* 54: 145-163.
- 728 32. Beall CM (2007) Two routes to functional adaptation: Tibetan and Andean high-altitude natives.  
729 *Proc Natl Acad Sci USA* 104: 8655-8660.
- 730 33. Beall CM, Cavalleri GL, Deng L, Elston RC, Gao Y, Knight J et al. (2010) Natural selection on  
731 *EPAS1* (*HIF2a*) associated with low hemoglobin concentration in Tibetan highlanders. *Proc Natl*  
732 *Acad Sci USA* 107: 11459-11464.
- 733 34. Yi X, Liang Y, Huerta-Sanchez E, Jin X, Cuo ZXP, Pool JE et al. (2010) Sequencing of 50 human  
734 exomes reveals adaptation to high altitude. *Science* 329: 75-78.
- 735 35. Simonson TS, Yang Y, Huff CD, Yun H, Qin G, Witherspoon DJ et al. (2010) Genetic evidence  
736 for high-altitude adaptation in Tibet. *Science* 329: 72-75.
- 737 36. Kaelin Jr WG and Ratcliffe PJ (2008) Oxygen sensing by metazoans: the central role of the HIF  
738 hydroxylase pathway. *Mol Cell* 30: 393-402.
- 739 37. Xiang K, Peng Y, Yang Z, Zhang X, Cui C, Zhang H et al. (2013) Identification of a Tibetan-  
740 specific mutation in the hypoxic gene *EGLN1* and its contribution to high-altitude adaptation. *Mol*  
741 *Biol Evol* 30: 1889-1898.
- 742 38. Yang J, Jin Z-B, Chen J, Huang X-F, Li X-M, Liang Y-B et al. (2017) Genetic signatures of high-  
743 altitude adaptation in Tibetans. *Proc Natl Acad Sci USA* 114: 4189-4194.
- 744 39. Peng Y, Cui C and He Y (2017) Down-regulation of *EPAS1* transcription and genetic adaptation  
745 of Tibetans to high-altitude hypoxia. *Mol Biol Evol* 34: 818-830.
- 746 40. Lorenzo FR, Huff C, Myllymaki M, Olenchock B, Swierczek S, Tashi T et al. (2014) A genetic  
747 mechanism for Tibetan high-altitude adaptation. *Nat Genet* 46: 951-956.
- 748 41. Jeong C, Alkorta-Aranburu G, Basnyat B, Neupane M, Witonsky DB, Pritchard JK et al. (2014)  
749 Admixture facilitates genetic adaptations to high altitude in Tibet. *Nat Commun* 5: 3281.
- 750 42. Mallick S, Li H, Lipson M, Mathieson I, Gymrek M, Racimo F et al. (2016) The Simons Genome  
751 Diversity Project: 300 genomes from 142 diverse populations. *Nature* 538: 201-206.
- 752 43. The 1000 Genomes Project Consortium (2015) A global reference for human genetic variation.  
753 *Nature* 526: 68-74.

- 754 44. Wang K, Li M and Hakonarson H (2010) ANNOVAR: functional annotation of genetic variants  
755 from high-throughput sequencing data. *Nucleic Acids Res* 38: e164-e164.
- 756 45. Howie BN, Donnelly P and Marchini J (2009) A flexible and accurate genotype imputation  
757 method for the next generation of genome-wide association studies. *PLoS Genet* 5: e1000529.
- 758 46. Zhou X and Stephens M (2012) Genome-wide efficient mixed-model analysis for association  
759 studies. *Nat Genet* 44: 821-824.
- 760 47. Cho JI, Basnyat B, Jeong C, Di Rienzo A, Childs G, Craig SR et al. (2017) Ethnically Tibetan  
761 women in Nepal with low hemoglobin concentration have better reproductive outcomes. *Evol*  
762 *Med Public Health* 2017: 82-96.
- 763 48. GTEx Consortium (2017) Genetic effects on gene expression across human tissues. *Nature* 550:  
764 204-213.
- 765 49. Christophersen IE, Magnani JW, Yin X, Barnard J, Weng L-C, Arking DE et al. (2017) Fifteen  
766 genetic loci associated with the electrocardiographic P wave. *Circ Cardiovasc Genet* 10: e001667.
- 767 50. Hong K-W, Kim SS and Kim Y (2013) Genome-wide association study of orthostatic hypotension  
768 and supine-standing blood pressure changes in two Korean populations. *Genomics Inform* 11: 129-  
769 134.
- 770 51. Astle WJ, Elding H, Jiang T, Allen D, Ruklisa D, Mann AL et al. (2016) The allelic landscape of  
771 human blood cell trait variation and links to common complex disease. *Cell* 167: 1415-  
772 1429.e1419.
- 773 52. Den Hoed M, Eijgelsheim M, Esko T, Brundel BJ, Peal DS, Evans DM et al. (2013) Identification  
774 of heart rate-associated loci and their effects on cardiac conduction and rhythm disorders. *Nat*  
775 *Genet* 45: 621-631.
- 776 53. Jeff JM, Ritchie MD, Denny JC, Kho AN, Ramirez AH, Crosslin D et al. (2013) Generalization of  
777 variants identified by genome-wide association studies for electrocardiographic traits in African  
778 Americans. *Ann Hum Genet* 77: 321-332.
- 779 54. McDonald M-LN, Cho MH, Sørheim I-C, Lutz SM, Castaldi PJ, Lomas DA et al. (2014)  
780 Common genetic variants associated with resting oxygenation in chronic obstructive pulmonary  
781 disease. *Am J Respir Cell Mol Biol* 51: 678-687.
- 782 55. Hodonsky CJ, Jain D, Schick UM, Morrison JV, Brown L, McHugh CP et al. (2017) Genome-  
783 wide association study of red blood cell traits in Hispanics/Latinos: The Hispanic Community  
784 Health Study/Study of Latinos. *PLoS Genet* 13: e1006760.
- 785 56. van Rooij FJ, Qayyum R, Smith AV, Zhou Y, Trompet S, Tanaka T et al. (2017) Genome-wide  
786 Trans-ethnic Meta-analysis Identifies Seven Genetic Loci Influencing Erythrocyte Traits and a  
787 Role for RBPMS in Erythropoiesis. *Am J Hum Genet* 100: 51-63.
- 788 57. Van Der Harst P, Zhang W, Leach IM, Rendon A, Verweij N, Sehmi J et al. (2012) Seventy-five  
789 genetic loci influencing the human red blood cell. *Nature* 492: 369-375.
- 790 58. Lou H, Lu Y, Lu D, Fu R, Wang X, Feng Q et al. (2015) A 3.4-kb copy-number deletion near  
791 *EPAS1* is significantly enriched in high-altitude Tibetans but absent from the Denisovan sequence.  
792 *Am J Hum Genet* 97: 54-66.
- 793 59. Lorenzo FR, Huff C, Myllymaki M, Olenchock B, Swierczek S, Tashi T et al. (2014) A genetic  
794 mechanism for Tibetan high-altitude adaptation. *Nat Genet* 46: 951-956.
- 795 60. Tashi T, Reading NS, Wuren T, Zhang X, Moore LG, Hu H et al. (2017) Gain-of-function *EGLN1*  
796 prolyl hydroxylase (PHD2 D4E: C127S) in combination with *EPAS1* (HIF-2 $\alpha$ ) polymorphism  
797 lowers hemoglobin concentration in Tibetan highlanders. *J Mol Med* 95: 665-670.
- 798 61. Peng Y, Yang Z, Zhang H, Cui C, Qi X, Luo X et al. (2011) Genetic variations in Tibetan  
799 populations and high-altitude adaptation at the Himalayas. *Mol Biol Evol* 28: 1075-1081.
- 800 62. Bigham AW and Lee FS (2014) Human high-altitude adaptation: forward genetics meets the HIF  
801 pathway. *Genes Dev* 28: 2189-2204.

- 802 63. Marigorta UM and Navarro A (2013) High trans-ethnic replicability of GWAS results implies  
803 common causal variants. *PLoS Genet* 9: e1003566.
- 804 64. Hackinger S, Kraaijenbrink T, Xue Y, Mezzavilla M, van Driem G, Jobling MA et al. (2016)  
805 Wide distribution and altitude correlation of an archaic high-altitude-adaptive *EPAS1* haplotype in  
806 the Himalayas. *Hum Genet* 135: 393-402.
- 807 65. Kinzler WL, Ananth CV and Vintzileos AM (2000) Medical and economic effects of twin  
808 gestations. *J Soc Gynecol Investig* 7: 321-327.
- 809 66. Kotan LD, Hutchins BI, Ozkan Y, Demirel F, Stoner H, Cheng PJ et al. (2014) Mutations in  
810 *FEZF1* cause Kallmann syndrome. *Am J Hum Genet* 95: 326-331.
- 811 67. Schafer S, de Marvao A, Adami E, Fiedler LR, Ng B, Khin E et al. (2017) Titin-truncating  
812 variants affect heart function in disease cohorts and the general population. *Nat Genet* 49: 46-53.
- 813 68. Ware JS, Li J, Mazaika E, Yasso CM, DeSouza T, Cappola TP et al. (2016) Shared genetic  
814 predisposition in peripartum and dilated cardiomyopathies. *N Engl J Med* 374: 233-241.
- 815 69. Eppinga RN, Hagemeyer Y, Burgess S, Hinds DA, Stefansson K, Gudbjartsson DF et al. (2016)  
816 Identification of genomic loci associated with resting heart rate and shared genetic predictors with  
817 all-cause mortality. *Nat Genet* 48: 1557-1563.
- 818 70. Kondrashov A, Meijer HA, Barthet-Barateig A, Parker HN, Khurshid A, Tessier S et al. (2012)  
819 Inhibition of polyadenylation reduces inflammatory gene induction. *RNA* 18: 2236-2250.
- 820 71. Winslow RM, Chapman KW, Gibson C, Samaja M, Monge C, Goldwasser E et al. (1989)  
821 Different hematologic responses to hypoxia in Sherpas and Quechua Indians. *J Appl Physiol* 66:  
822 1561-1569.
- 823 72. Petousi N and Robbins PA (2014) Human adaptation to the hypoxia of high altitude: the Tibetan  
824 paradigm from the pregenomic to the postgenomic era. *J Appl Physiol* 116: 875-884.
- 825 73. León-Velarde F, Rivera-Ch M, Huicho L and Villafuerte FC (2014) Chronic mountain sickness.  
826 In: Swenson ER and Bärtsch P (eds). *High altitude: human adaptation to hypoxia*. New York, NY,  
827 USA: Springer. p. 429-447.
- 828 74. Morpurgo G, Arese P, Bosia A, Pescarmona G, Luzzana M and Modiano G (1976) Sherpas living  
829 permanently at high altitude: a new pattern of adaptation. *Proc Natl Acad Sci USA* 73: 747-751.
- 830 75. Wu T, Wang X, Wei C, Cheng H, Wang X, Li Y et al. (2005) Hemoglobin levels in Qinghai-Tibet:  
831 different effects of gender for Tibetans vs. Han. *J Appl Physiol* 98: 598-604.
- 832 76. The EPC (2012) An integrated encyclopedia of DNA elements in the human genome. *Nature* 489:  
833 57.
- 834 77. World Health Organization (2001) Iron deficiency anaemia: assessment, prevention and control: a  
835 guide for programme managers. Geneva: World Health Organization. 114 p.
- 836 78. Shah T, Liu J, Floyd J, Morris JA, Wirth N, Barrett JC et al. (2012) optiCall: a robust genotype-  
837 calling algorithm for rare, low-frequency and common variants. *Bioinformatics* 28: 1598-1603.
- 838 79. Purcell S, Neale B, Todd-Brown K, Thomas L, Ferreira MA, Bender D et al. (2007) PLINK: a  
839 tool set for whole-genome association and population-based linkage analyses. *Am J Hum Genet*  
840 81: 559-575.
- 841 80. Wang B, Zhang Y-B, Zhang F, Lin H, Wang X, Wan N et al. (2011) On the origin of Tibetans and  
842 their genetic basis in adapting high-altitude environments. *PLoS One* 6: e17002.
- 843 81. Alexander DH, Novembre J and Lange K (2009) Fast model-based estimation of ancestry in  
844 unrelated individuals. *Genome Res* 19: 1655-1664.
- 845 82. Moltke I and Albrechtsen A (2014) RelateAdmix: a software tool for estimating relatedness  
846 between admixed individuals. *Bioinformatics* 30: 1027-1028.
- 847 83. Li H and Durbin R (2009) Fast and accurate short read alignment with Burrows–Wheeler  
848 transform. *Bioinformatics* 25: 1754-1760.

- 849 84. McKenna A, Hanna M, Banks E, Sivachenko A, Cibulskis K, Kernytsky A et al. (2010) The  
850 Genome Analysis Toolkit: a MapReduce framework for analyzing next-generation DNA  
851 sequencing data. *Genome Res* 20: 1297-1303.
- 852 85. DePristo MA, Banks E, Poplin R, Garimella KV, Maguire JR, Hartl C et al. (2011) A framework  
853 for variation discovery and genotyping using next-generation DNA sequencing data. *Nat Genet* 43:  
854 491-498.
- 855 86. Auwera GA, Carneiro MO, Hartl C, Poplin R, del Angel G, Levy-Moonshine A et al. (2013)  
856 From FastQ data to high-confidence variant calls: the genome analysis toolkit best practices  
857 pipeline. *Curr Protoc Bioinformatics* 43: 11.10.11-11.10.33.
- 858 87. Li H, Handsaker B, Wysoker A, Fennell T, Ruan J, Homer N et al. (2009) The sequence  
859 alignment/map format and SAMtools. *Bioinformatics* 25: 2078-2079.
- 860 88. Jun G, Wing MK, Abecasis GR and Kang HM (2015) An efficient and scalable analysis  
861 framework for variant extraction and refinement from population-scale DNA sequence data.  
862 *Genome Res* 25: 918-925.
- 863 89. Chang CC, Chow CC, Tellier L, Vattikuti S, Purcell SM and Lee JJ (2015) Second-generation  
864 PLINK: rising to the challenge of larger and richer datasets. *Gigascience* 4: 7.
- 865 90. Weir BS and Cockerham CC (1984) Estimating F-statistics for the analysis of population structure.  
866 *Evolution* 38: 1358-1370.
- 867 91. McVicker G, Gordon D, Davis C and Green P (2009) Widespread genomic signatures of natural  
868 selection in hominid evolution. *PLoS Genet* 5: e1000471.
- 869  
870



## A. Genomic Data Production

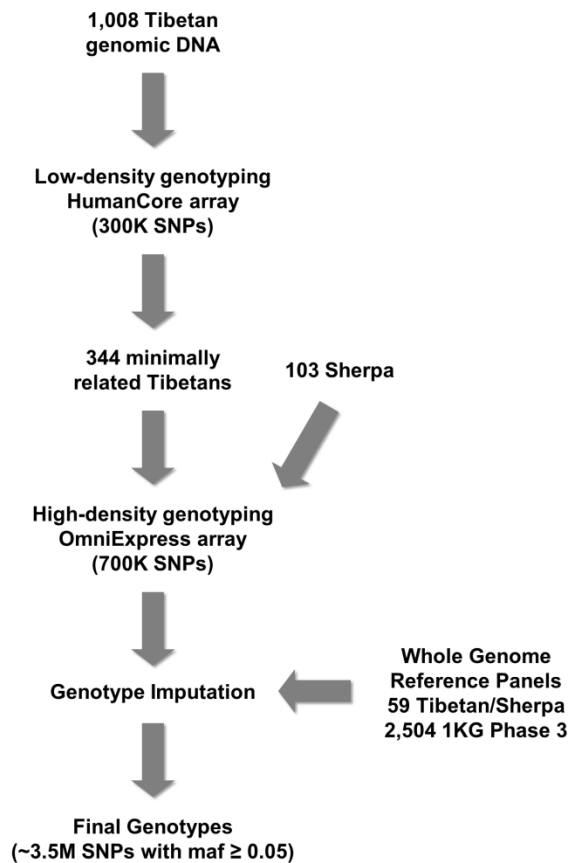

## B. Physiological phenotypes

- Hb (total hemoglobin; g/dL)
- SaO<sub>2</sub> (% oxygen saturation in arterial blood)
- Pulse
- oxyHb = Hb × (SaO<sub>2</sub> / 100)
- deoxyHb = Hb - oxyHb

## C. Fertility phenotypes

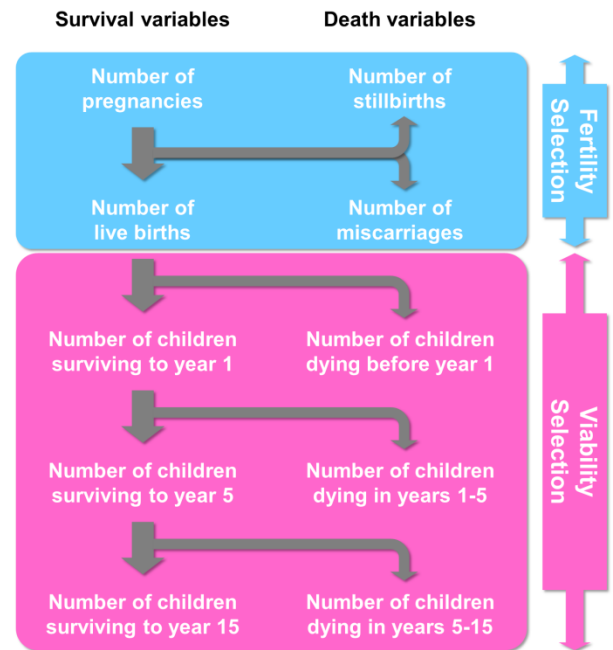

871  
872

873 **Figure 1.** A schematic summary of the genotype and phenotype data of ethnic Tibetans in this study. (A)  
874 We array genotyped all individuals in several Illumina platforms and generated whole genome sequences  
875 for a representative subset without recent admixture. Then, all individuals went through genotype  
876 imputation using our high altitude sequence data (“high altitude panel”) and world-wide data (“1KG phase  
877 3 panel”) as reference haplotype panels. (B) Three physiological phenotypes were directly measured in the  
878 field, and two additional ones (oxyHb and deoxyHb) were constructed from them. (C) Fertility phenotypes  
879 capture both fertility and viability selection components. For details, please see [Materials and Methods](#).  
880



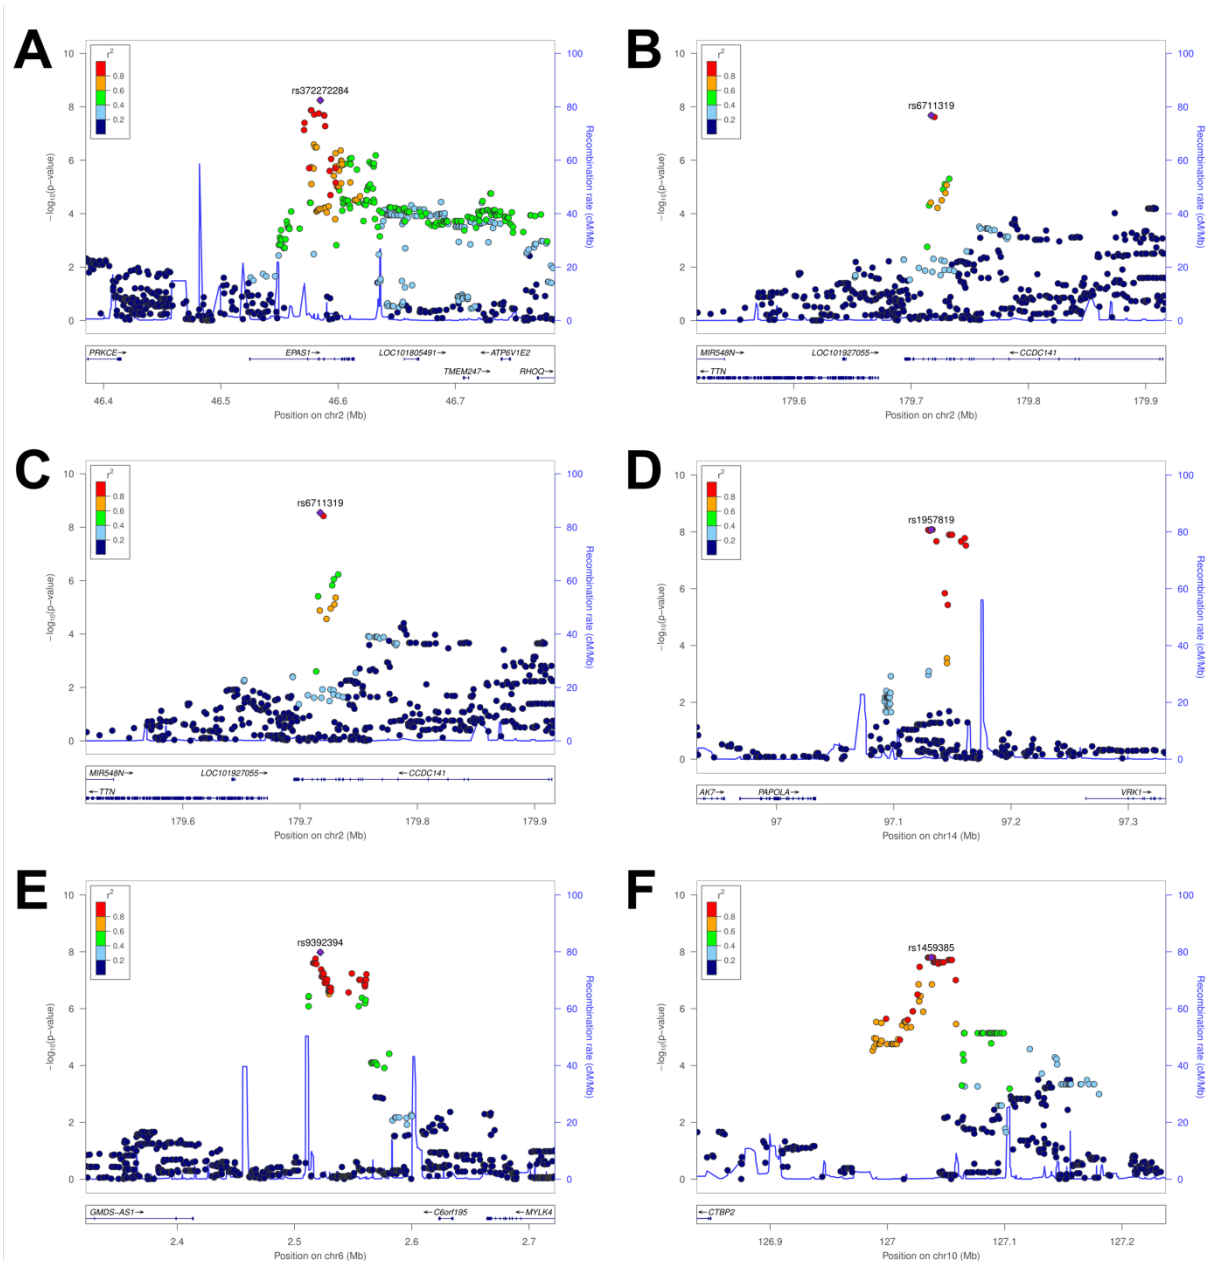

881  
882  
883  
884  
885  
886  
887  
888  
889

**Figure 2.** Locuszoom plots of the genome-wide significant associations found in Tibetans: (A) oxyHb and rs372272284 in the *EPAS1* gene, (B) the numbers of pregnancies or (C) live births and rs6711319 in the *CCDC141* gene, (D) the number of stillbirths and rs1957819 near the *PAPOLA* gene, (E, F) the proportion of offsprings died before age 15 years among the born alive and rs9392394/rs1459385. (A-C, E) are tests with all samples and (D, F) are those with the continuously married subset.

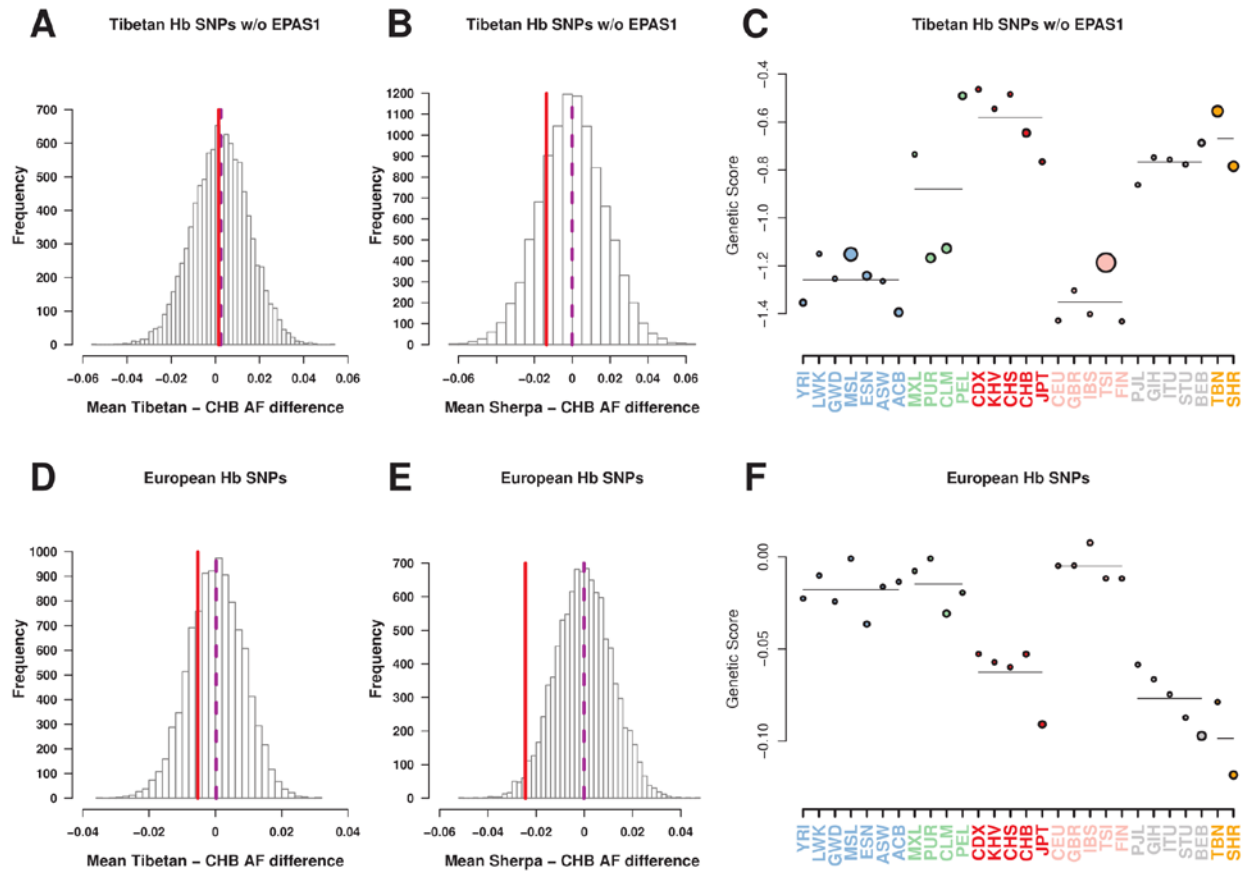

890  
891  
892  
893  
894  
895  
896  
897  
898  
899

**Figure 3.** Tests of polygenic adaptation of Hb-associated SNPs: (A-C) 35 SNPs from our Tibetan GWAS ( $p \leq 10^{-4}$ ) after excluding the *EPAS1* SNP rs372272284, and (D-F) 96 genome-wide significant SNPs from a large GWAS of mostly European cohorts. The mean frequency differences of trait-increasing alleles between Tibetans and CHB (A, D) and between Sherpa and CHB (B, E) were presented (solid red line) together with the empirical null distribution of 10,000 sets of matched random SNPs. (C, F) The genetic values of populations (filled dots) and of regions (horizontal lines) were plotted. The size of dots and the width of lines are proportional to the significance of the corresponding outlier test.

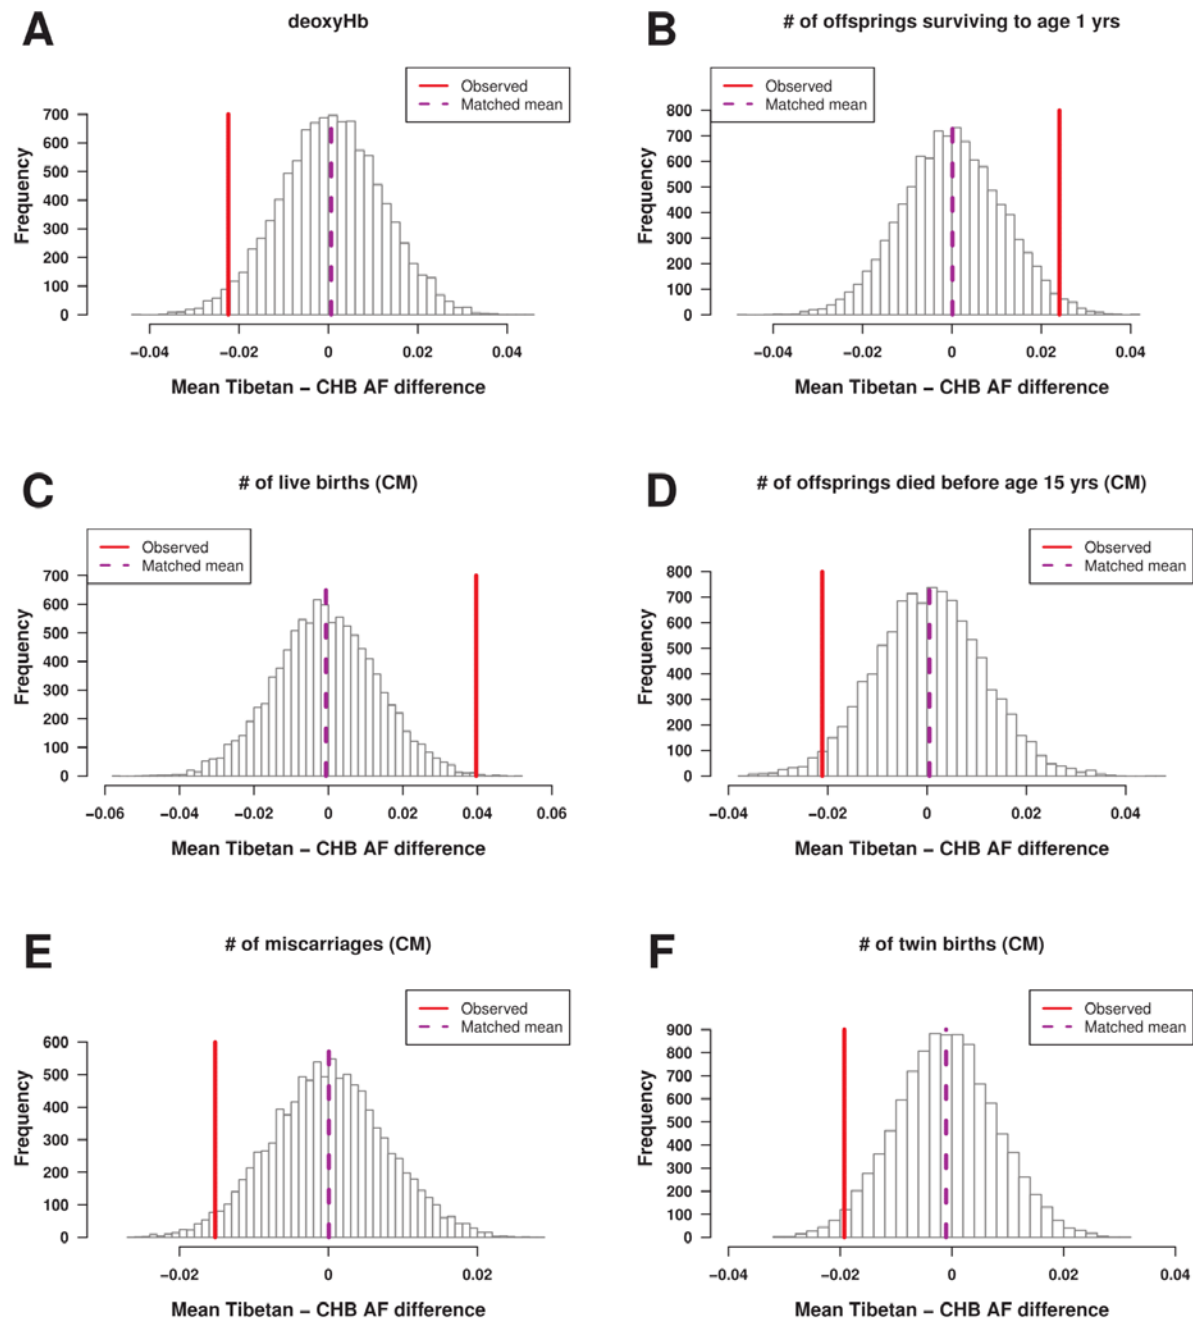

900  
901  
902  
903  
904  
905  
906

**Figure 4.** Phenotypes showing signatures of polygenic adaptations in Tibetans. The mean frequency difference of trait-increasing alleles was presented (solid red line) together with the empirical null distribution of 10,000 sets of matched random SNPs. (C-F) uses GWAS SNPs from the “CM” subset.

907 **Table 1.** Genome-wide significant association peaks among Tibetan women. “nSNPs” shows the number of genome-wide significant SNPs in  
908 each peak. “Top SNP” provides the rsID of the most significant SNP with effect / non-effect alleles. We chose the Tibetan minor allele as the  
909 effect allele. “Pos” is the genomic position of the top SNP in hg19 coordinates. Per allele effect size is provided in the  $\beta$  column.  
910

| Pheno                                                      | CHR | nSNPs | Top SNP              | Pos         | Minor allele frequency <sup>a</sup> | $\beta^b$ | <i>P</i>              | PBS   | Gene                        |
|------------------------------------------------------------|-----|-------|----------------------|-------------|-------------------------------------|-----------|-----------------------|-------|-----------------------------|
| oxyHb                                                      | 2   | 8     | rs372272284<br>(A/G) | 46,584,859  | 0.248                               | 0.386     | $5.71 \times 10^{-9}$ | 1.05  | <i>EPAS1</i><br>(genic)     |
| # of pregnancies                                           | 2   | 2     | rs6711319<br>(G/A)   | 179,717,217 | 0.248                               | -0.760    | $2.10 \times 10^{-8}$ | 0.00  | <i>CCDC141</i><br>(genic)   |
| # of live births                                           | 2   | 2     | rs6711319<br>(G/A)   | 179,717,217 | 0.248                               | -0.773    | $2.89 \times 10^{-9}$ | 0.00  | <i>CCDC141</i><br>(genic)   |
| # of stillbirths (CM)                                      | 14  | 14    | rs1957819<br>(T/C)   | 97,131,992  | 0.083                               | 0.284     | $8.38 \times 10^{-9}$ | -0.01 | <i>PAPOLA</i><br>(99 kb)    |
| Proportion of children born<br>alive who died < 15 yr      | 6   | 8     | rs9392394<br>(G/A)   | 2,522,000   | 0.442                               | -0.318    | $1.05 \times 10^{-8}$ | 0.00  | <i>C6orf195</i><br>(101 kb) |
| Proportion of children born<br>alive who died < 15 yr (CM) | 10  | 29    | rs1459385<br>(T/C)   | 127,037,417 | 0.089                               | 0.704     | $1.59 \times 10^{-8}$ | 0.02  | <i>CTBP2</i><br>(188 kb)    |

911 <sup>a</sup> Minor allele frequency in our Tibetan data set

912 <sup>b</sup> Per minor allele effect size estimates are in the unit of g/dL (oxyHb), the number of children (the numbers of pregnancies, live births and  
913 stillbirths), or residuals in log-odds scale for fertility proportion phenotypes (proportion of children born alive who died < 15 yr)

914

915

916 **Table 2.** *P* values for the correlation between fertility or fertility proportion phenotypes controlling for  
 917 covariates and the *EGLNI* and *EPASI* SNP genotypes. Per-allele selection coefficient for 80% power to  
 918 detect association in a single SNP test ( $\alpha = 0.05$ ) was estimated for fertility count phenotypes. No test  
 919 showed  $p \leq 0.01$ .  
 920

| Phenotype                                                 | <i>EGLNI</i> <sup>a</sup> |                            | <i>EPASI</i> <sup>b</sup> |                          |
|-----------------------------------------------------------|---------------------------|----------------------------|---------------------------|--------------------------|
|                                                           | <i>P</i> -value           | $s_{80\% \text{ power}}^c$ | <i>P</i> -value           | $s_{80\% \text{ power}}$ |
| # of pregnancies                                          | 0.564                     | 0.066                      | 0.621                     | 0.074                    |
| # of live births                                          | 0.925                     | 0.068                      | 0.951                     | 0.076                    |
| # of children born alive and died < 1 yr                  | 0.119                     | 0.146                      | 0.046                     | 0.152                    |
| # of children died $\geq 1$ yr and < 5 yrs                | 0.888                     | 0.197                      | 0.813                     | 0.203                    |
| # of children died $\geq 5$ yr and < 15 yrs               | 0.095                     | 0.256                      | 0.083                     | 0.259                    |
| # of children died < 5 yrs                                | 0.505                     | 0.126                      | 0.064                     | 0.132                    |
| # of children died < 15 yrs                               | 0.045                     | 0.140                      | 0.194                     | 0.147                    |
| # of children surviving at 1 yr                           | 0.970                     | 0.068                      | 0.395                     | 0.076                    |
| # of children surviving at 5 yr                           | 0.965                     | 0.073                      | 0.307                     | 0.082                    |
| # of children surviving at 15 yr                          | 0.599                     | 0.103                      | 0.670                     | 0.117                    |
| # of stillbirths                                          | 0.053                     | 0.273                      | 0.400                     | 0.274                    |
| # of miscarriages                                         | 0.111                     | 0.251                      | 0.117                     | 0.254                    |
| # of twin births                                          | 0.338                     |                            | 0.683                     |                          |
| A woman's age at her first childbirth                     | 0.090                     |                            | 0.346                     |                          |
| A woman's age at her last pregnancy                       | 0.187                     |                            | 0.151                     |                          |
| Proportion of live births among pregnancies               | 0.020                     |                            | 0.126                     |                          |
| Proportion of stillbirths among pregnancies               | 0.074                     |                            | 0.451                     |                          |
| Proportion of miscarriages among pregnancies              | 0.139                     |                            | 0.142                     |                          |
| Proportion of children born alive but died < 1 yr         | 0.159                     |                            | 0.025                     |                          |
| Proportion of children born alive but died < 5 yr         | 0.605                     |                            | 0.028                     |                          |
| Proportion of children born alive but died < 15 yr        | 0.147                     |                            | 0.177                     |                          |
| Proportion of children surviving at 1 yr but died < 5 yr  | 0.893                     |                            | 0.556                     |                          |
| Proportion of children surviving at 5 yr but died < 15 yr | 0.167                     |                            | 0.086                     |                          |

921 <sup>a</sup> The number of derived (Tibetan) allele in the *EGLNI* SNP rs186996510

922 <sup>b</sup> The number of derived (Tibetan) allele in the *EPASI* SNP rs372272284

923 <sup>c</sup> Estimated per allele selection coefficient for 80% power with a single test ( $\alpha = 0.05$ )

924

925

926 **Table 3.** Results of polygenic adaptation tests for a chosen set of physiology and fertility phenotypes.  
 927 Results for all GWAS phenotypes are presented in [Supplementary Table 8](#).  
 928

| Phenotype                                          | Direction <sup>a</sup> | GWAS sample <sup>b</sup> | Outlier test |                 | $P_{\text{freq.diff}}^c$ |
|----------------------------------------------------|------------------------|--------------------------|--------------|-----------------|--------------------------|
|                                                    |                        |                          | Statistic    | <i>P</i> -value |                          |
| <b>1. Fertility phenotypes</b>                     |                        |                          |              |                 |                          |
| A woman's age at her first childbirth              | -                      | CM                       | -1.9286      | 0.0000          | 0.576                    |
| # of live births                                   | +                      | CM                       | 2.5062       | 0.0020          | 0.002                    |
| # of miscarriages                                  | -                      | CM                       | -3.0936      | 0.0000          | 0.024                    |
| # of children born alive but died < 1 yr           | -                      | CM                       | -2.4325      | 0.0000          | 0.012                    |
| # of children born alive but died < 15 yr          | -                      | CM                       | -2.0293      | 0.0000          | 0.024                    |
| # of children born alive but died < 5 yr           | -                      | All                      | -1.5043      | 0.0000          | 0.134                    |
| # of children died ≥ 5 yr and < 15 yrs             | -                      | CM                       | -1.1255      | 0.0256          | 0.304                    |
| # of children surviving at 1 yr                    | +                      | All                      | 1.7603       | 0.0100          | 0.017                    |
| Proportion of children born alive but died < 15 yr | -                      | CM                       | -1.2639      | 0.0224          | 0.101                    |
| Proportion of stillbirths among pregnancies        | -                      | CM                       | -2.1763      | 0.0008          | 0.230                    |
| Proportion of stillbirths among pregnancies        | -                      | All                      | -1.6320      | 0.0004          | 0.285                    |
| # of twin births                                   | -                      | CM                       | -2.4344      | 0.0000          | 0.021                    |
| # of twin births                                   | -                      | All                      | -1.1421      | 0.0024          | 0.139                    |
| <b>2. Physiological phenotypes</b>                 |                        |                          |              |                 |                          |
| Hb                                                 | -                      |                          | -1.0490      | 0.0000          | 0.047                    |
| Hb without <i>EPAS1</i>                            | -                      |                          | -0.5003      | 0.8460          | 0.467                    |
| oxyHb                                              | -                      |                          | -0.5657      | 0.0008          | 0.102                    |
| oxyHb without <i>EPAS1</i>                         | -                      |                          | 0.8596       | 0.0656          | 0.554                    |
| deoxyHb                                            | -                      |                          | -1.4628      | 0.0024          | 0.023                    |
| Pulse                                              | -                      |                          | -0.4412      | 0.4048          | 0.062                    |

929 <sup>a</sup> Assumed direction of positive selection for each phenotype

930 <sup>b</sup> GWAS sample sets for fertility phenotypes: all samples (All) and continuously married subset (CM)

931 <sup>c</sup> One-sided empirical *p*-value for the mean frequency difference test

932
